# Supplementary material
Source: PubMed Central journal article supplement (PMC3941174)
Supplement: NIHMS551554-supplement-1_si_001.pdf [file NIHMS551554-supplement-1_si_001.pdf]

# **Stereodivergent Synthesis of Enantioenriched 4-Hydroxy-2-cyclopentenones**

**Gurpreet Singh, Angelica Meyer, and Jeffrey Aubé\***

*Department of Medicinal Chemistry, 1251 Wescoe Hall Drive, Malott Hall, Room 4070,  
University of Kansas, Lawrence, Kansas 66045-7582*

## **Supporting Information**

1. Copies of  $^1\text{H}$  and  $^{13}\text{C}$ -NMR spectra S2
2. GC and HPLC chromatograms S23

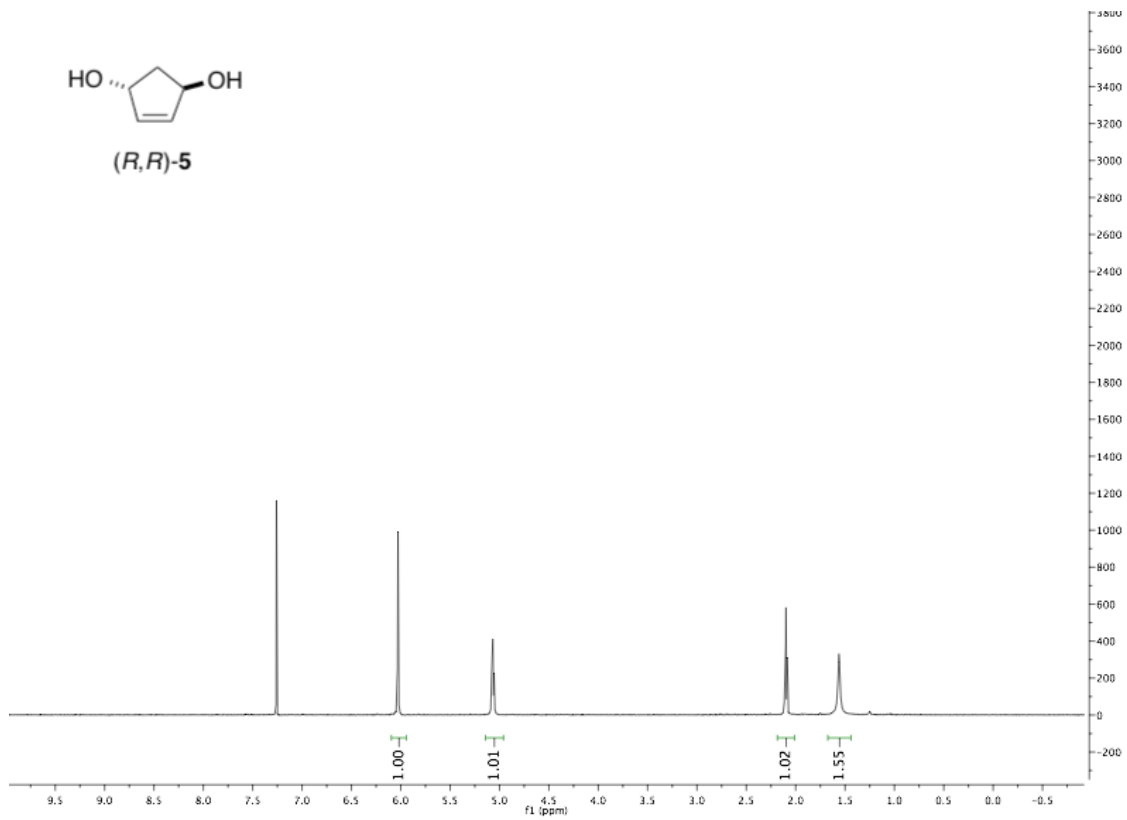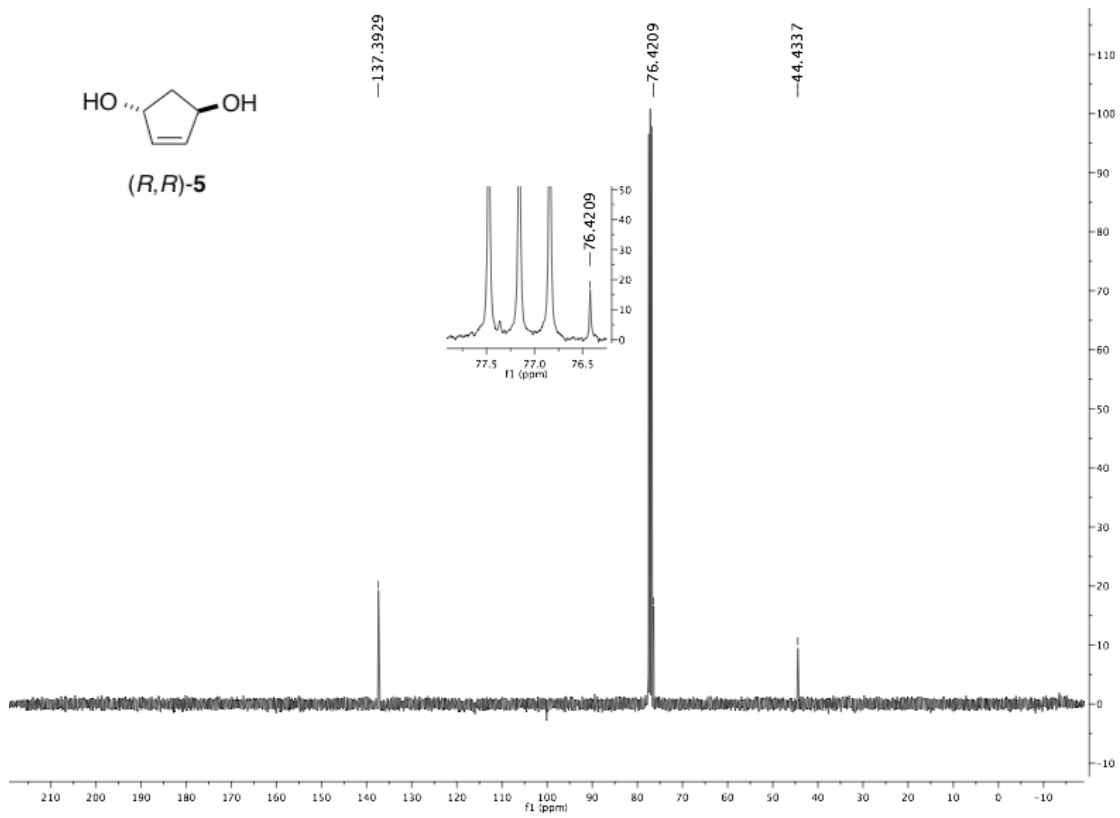

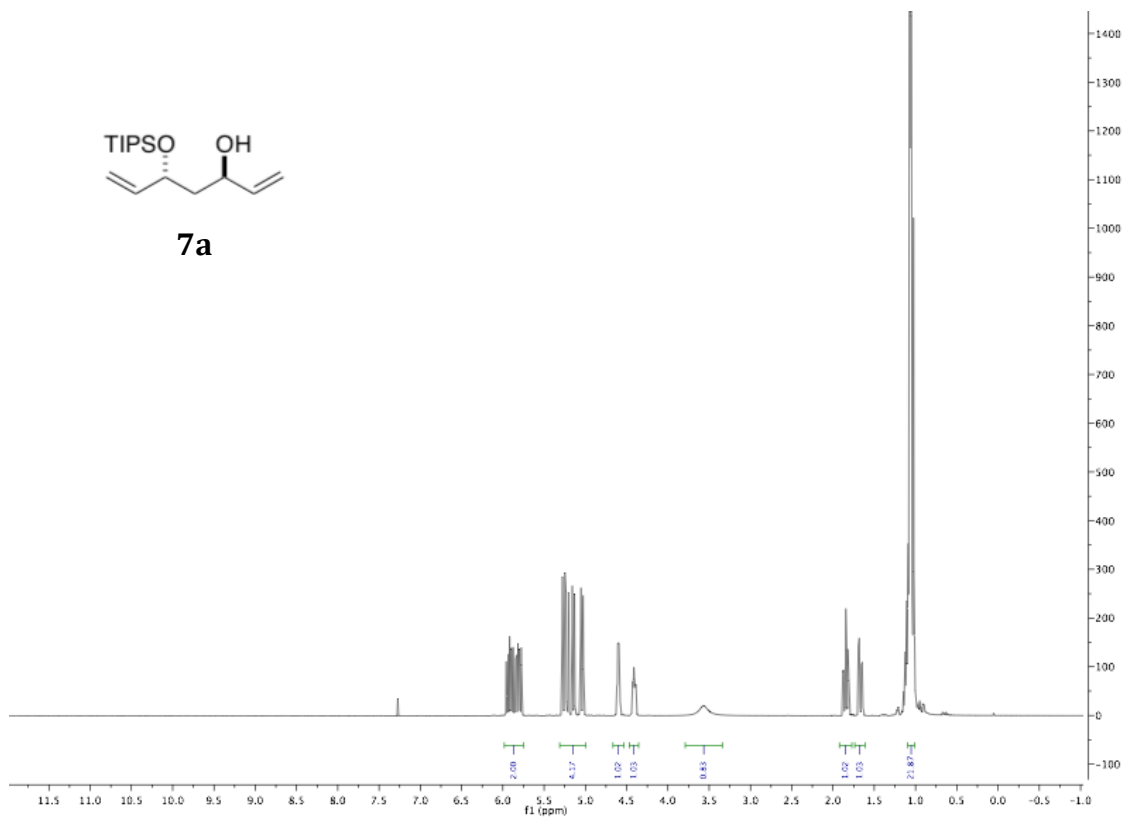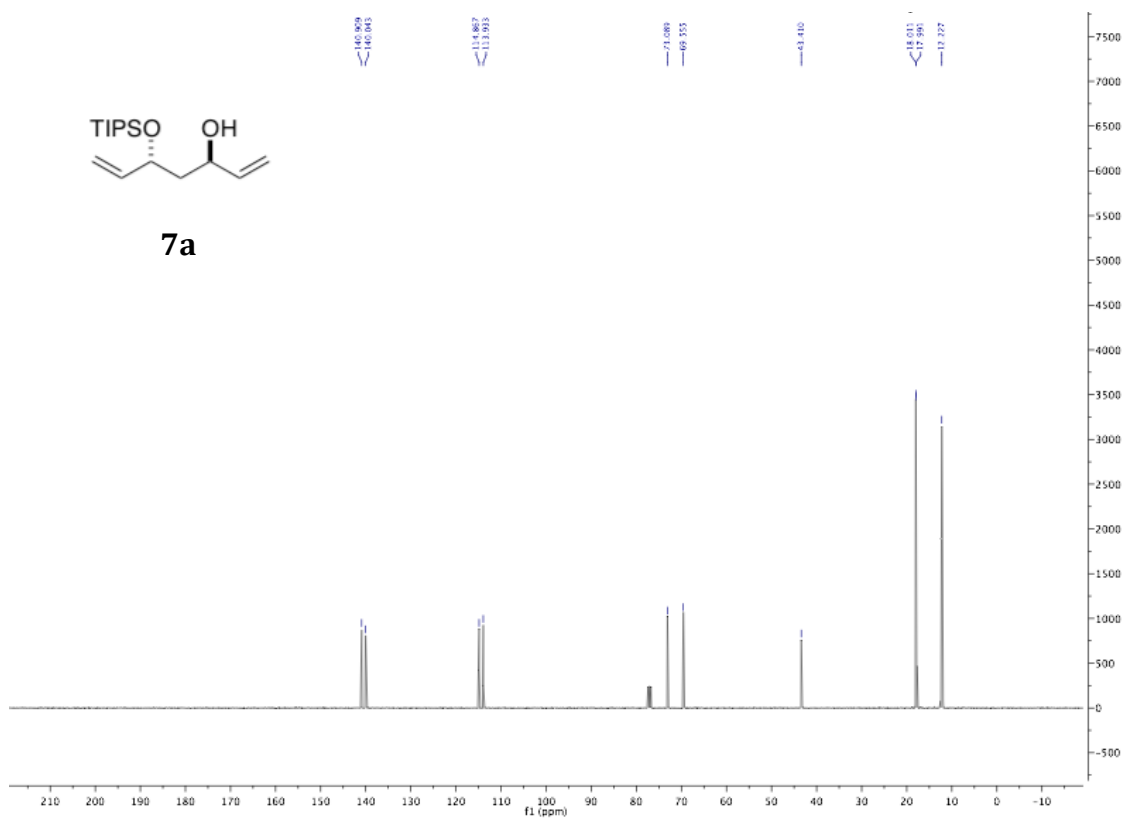

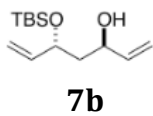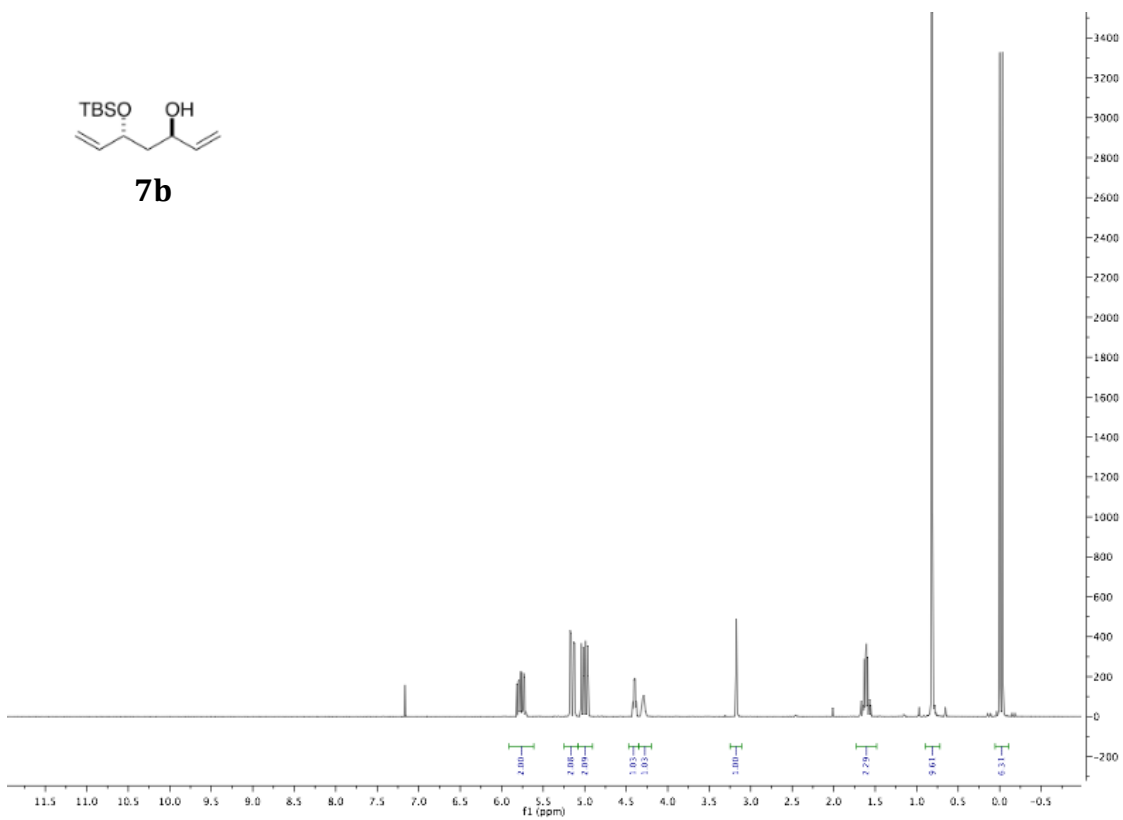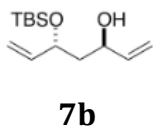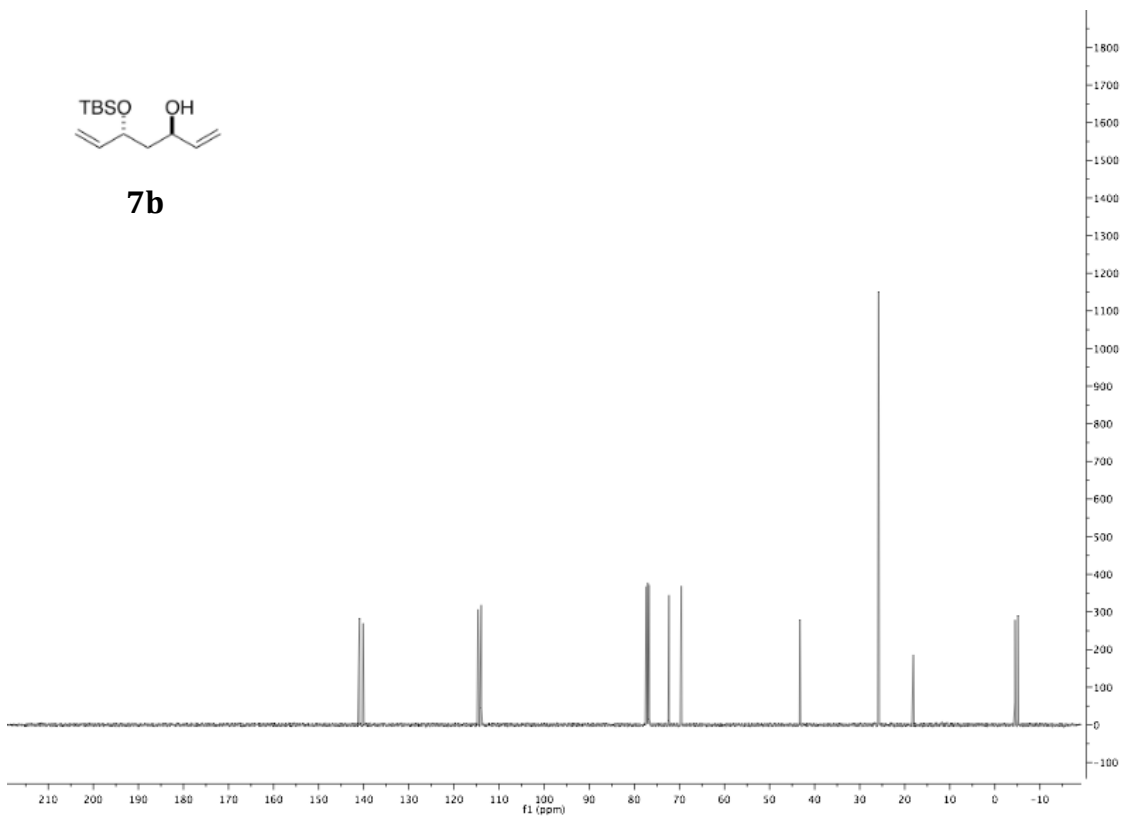

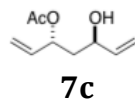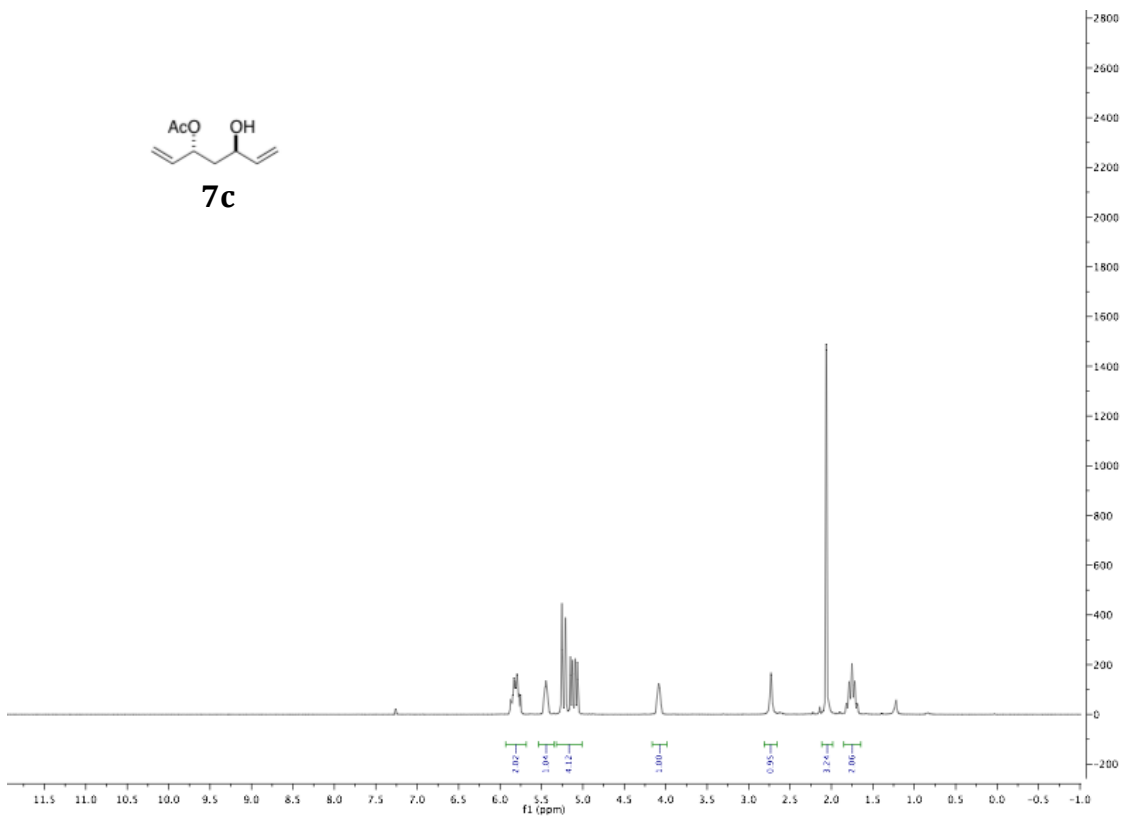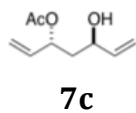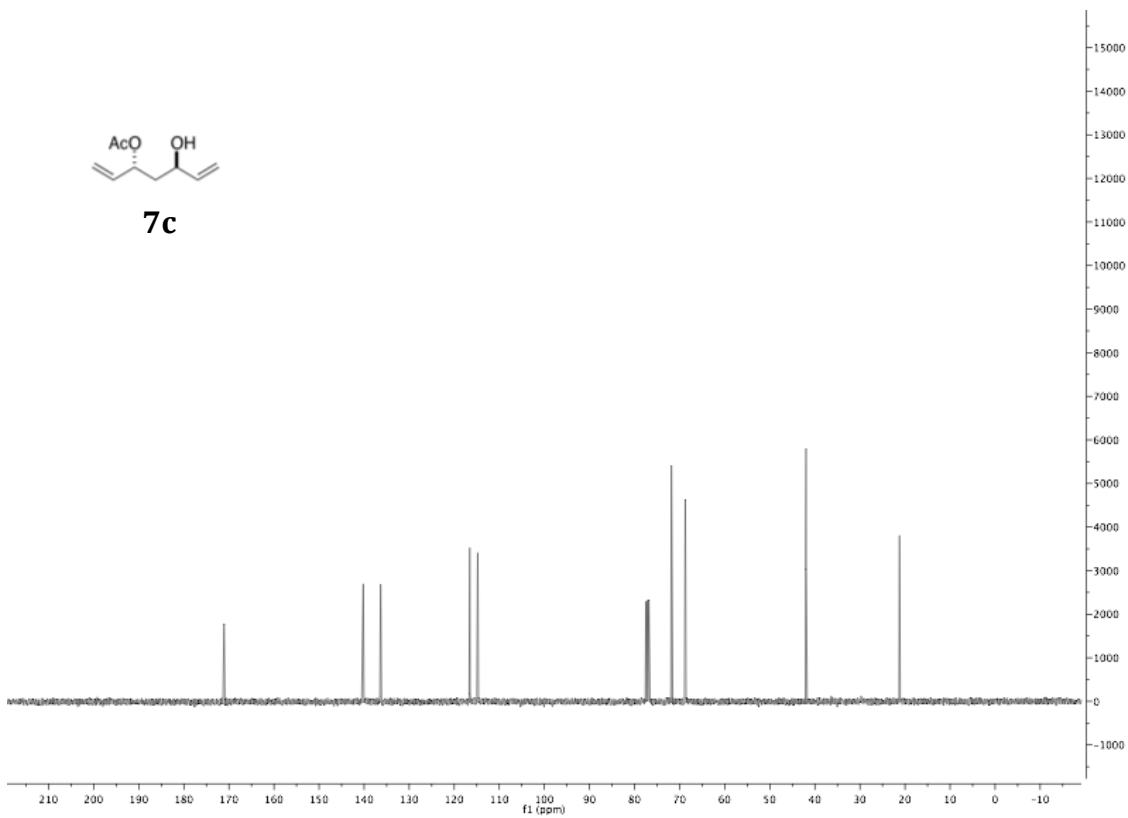

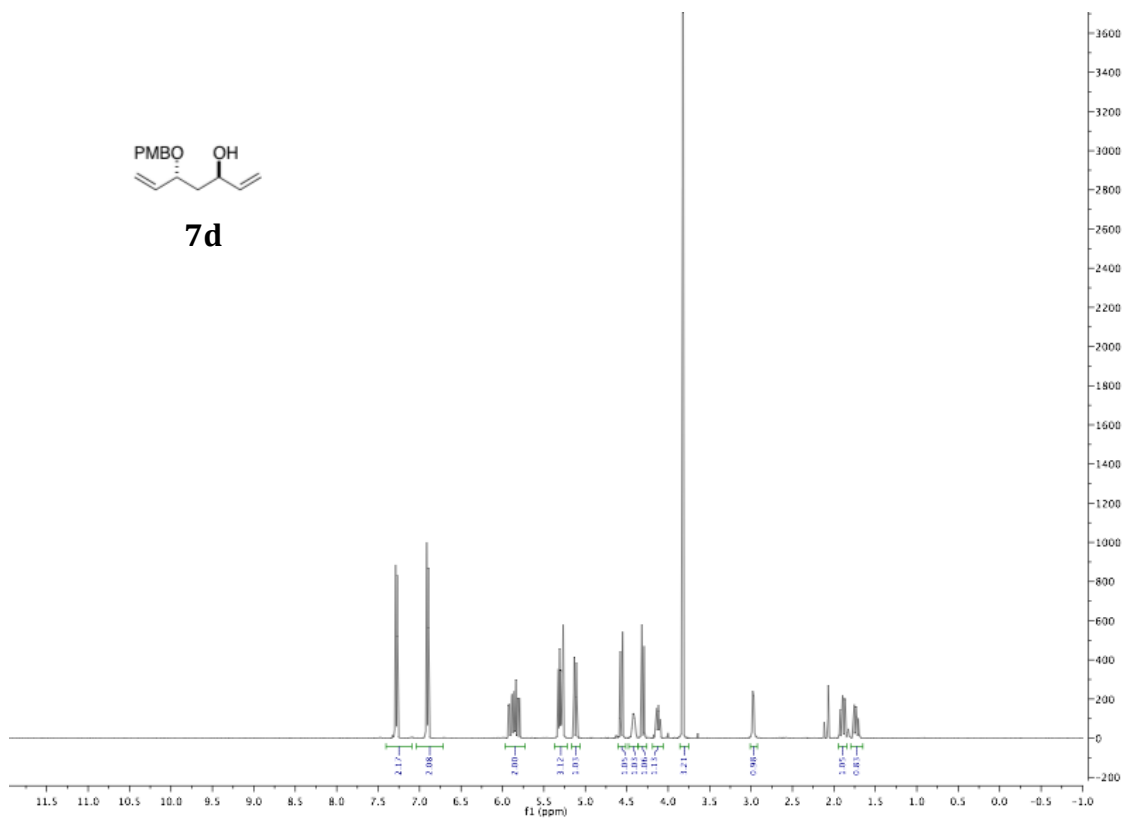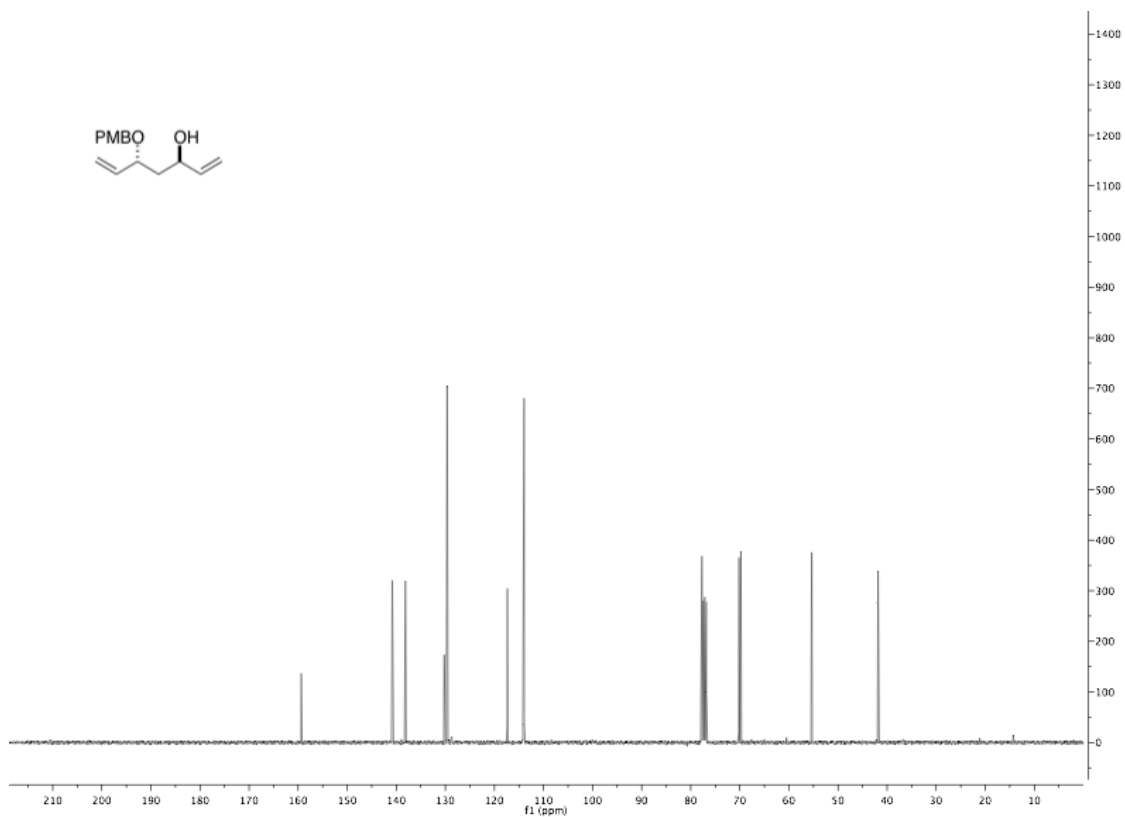

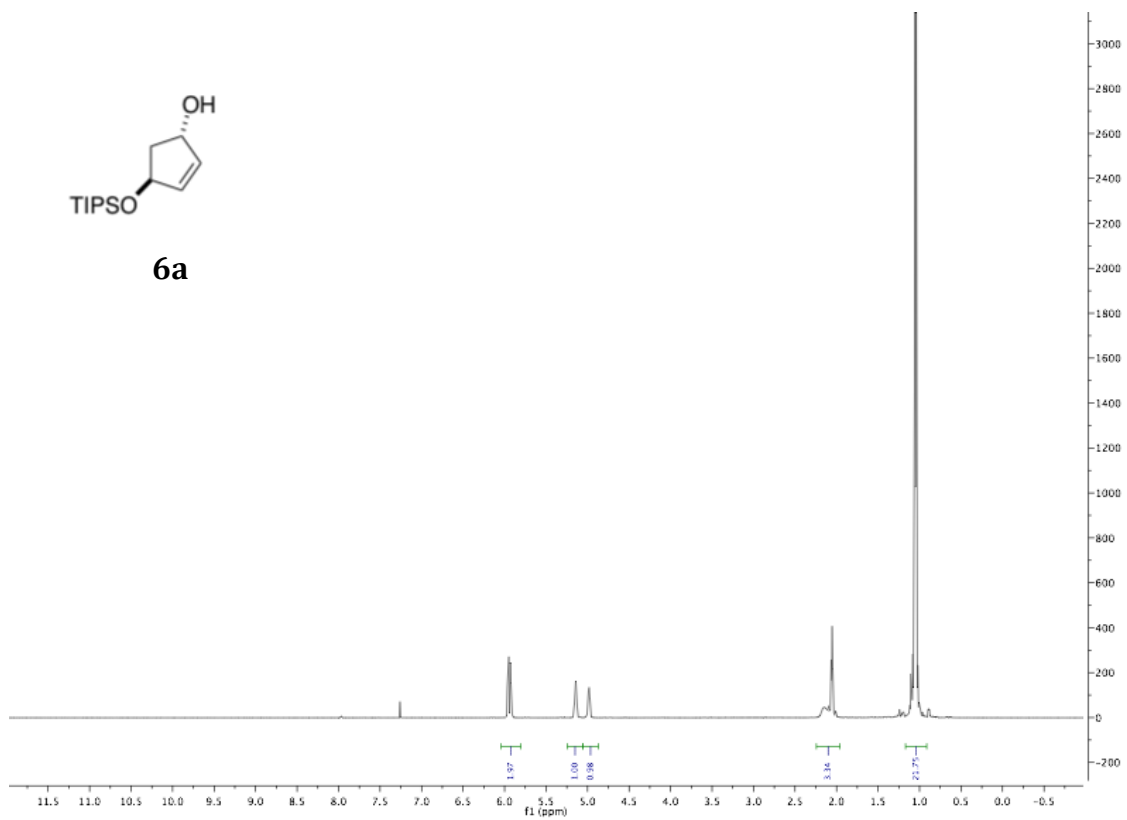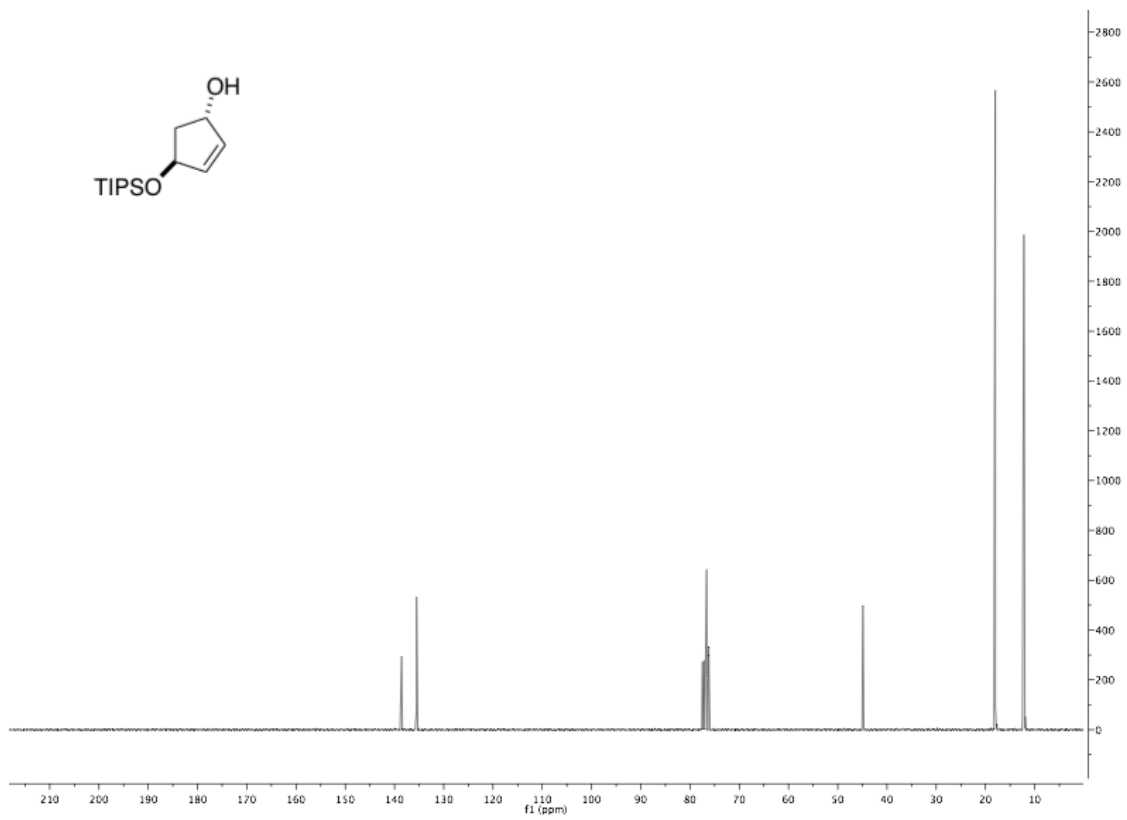

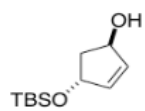

**6b**

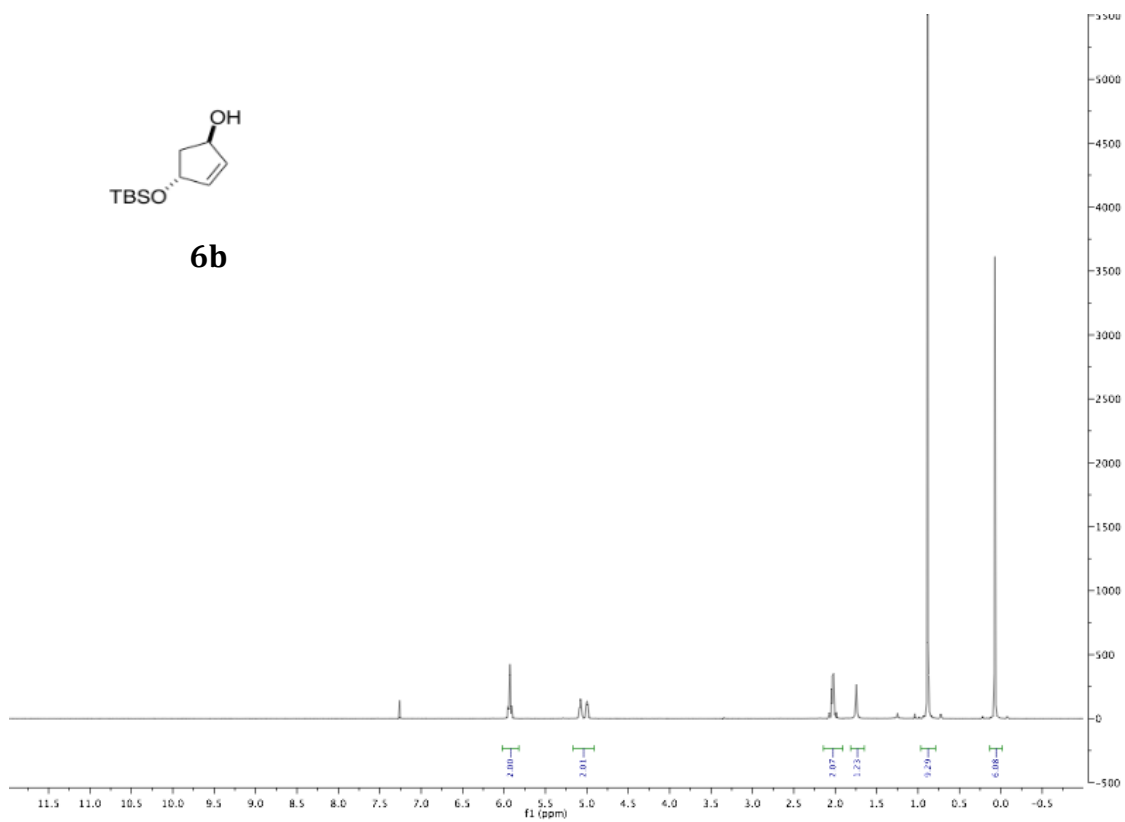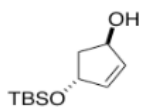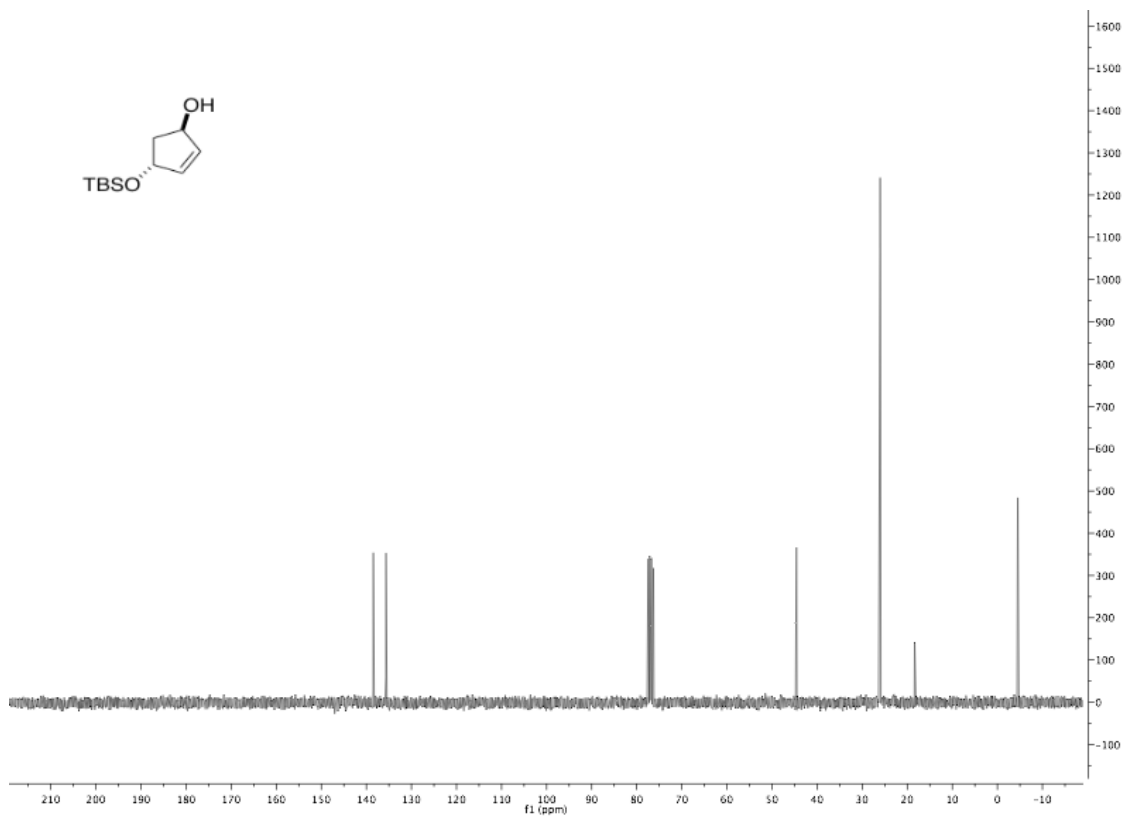



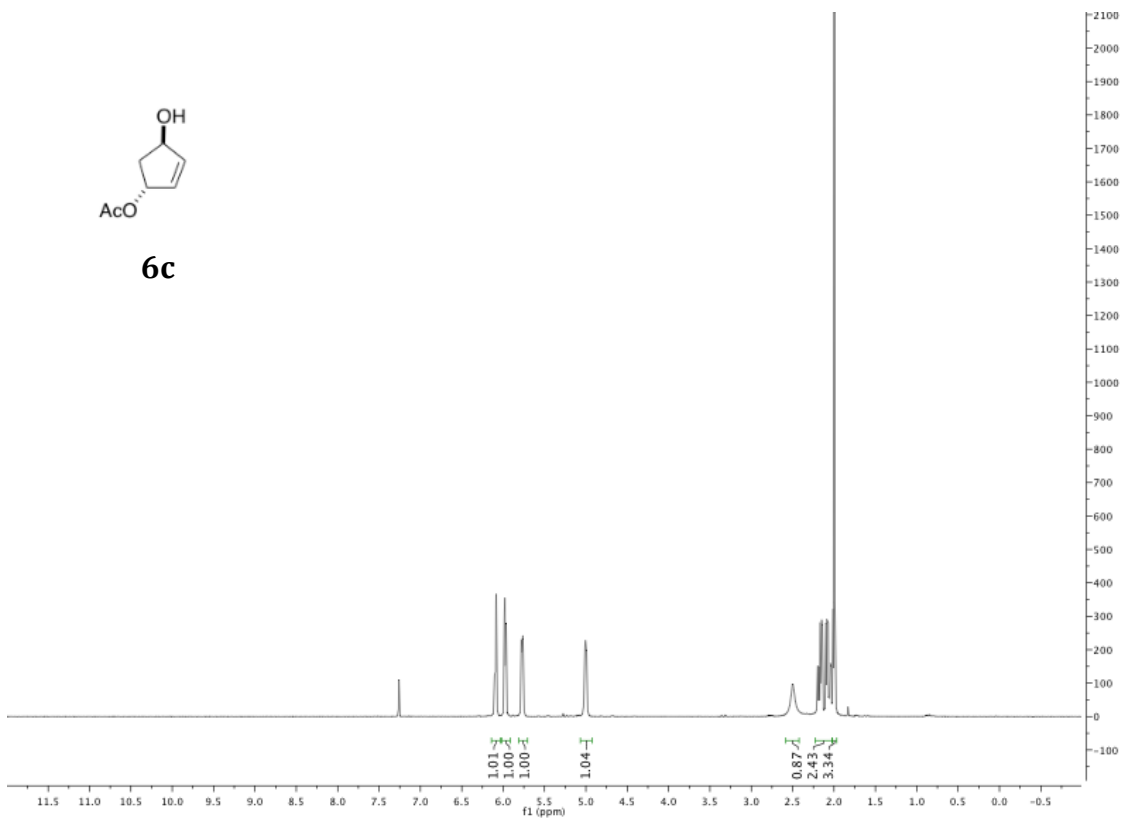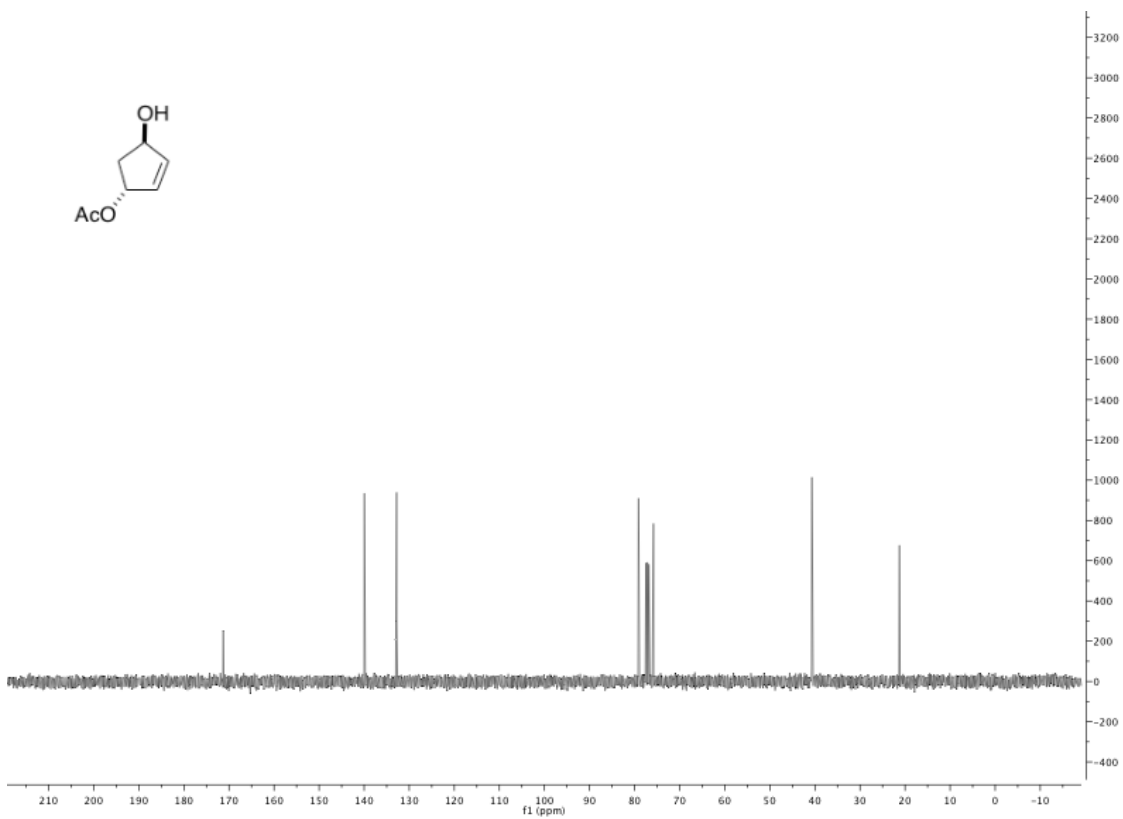

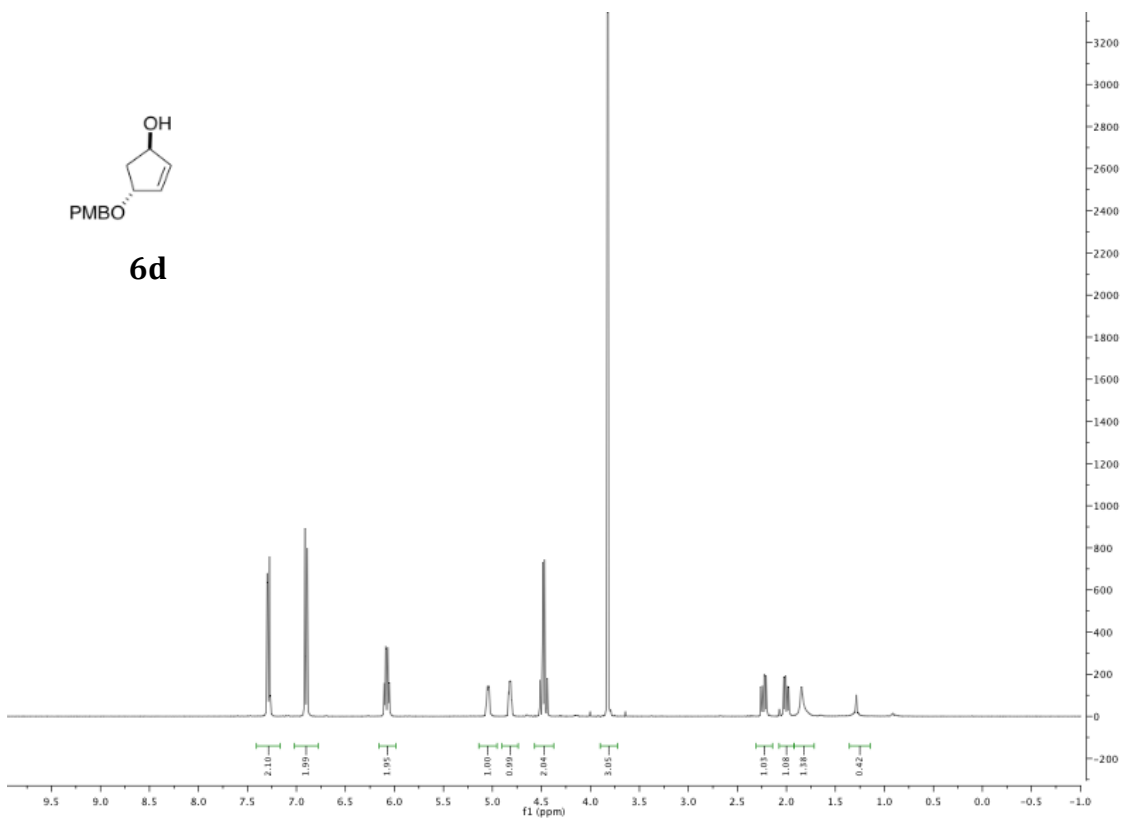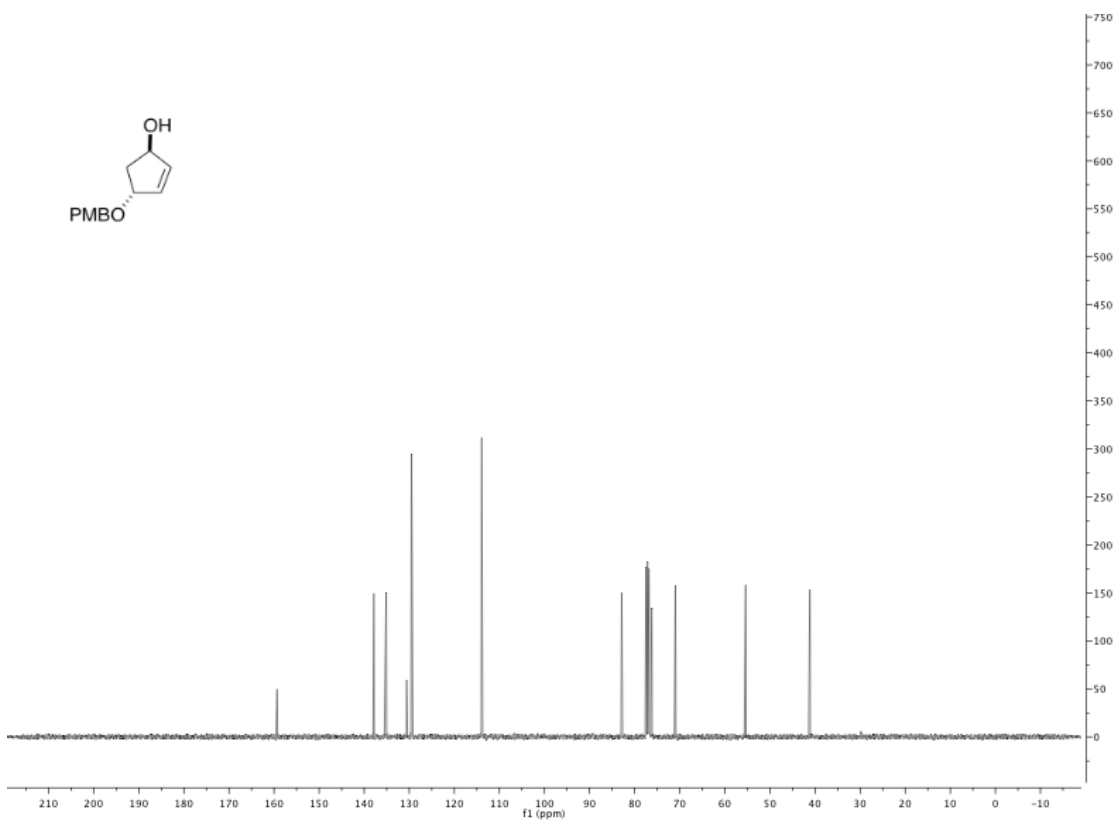

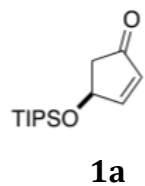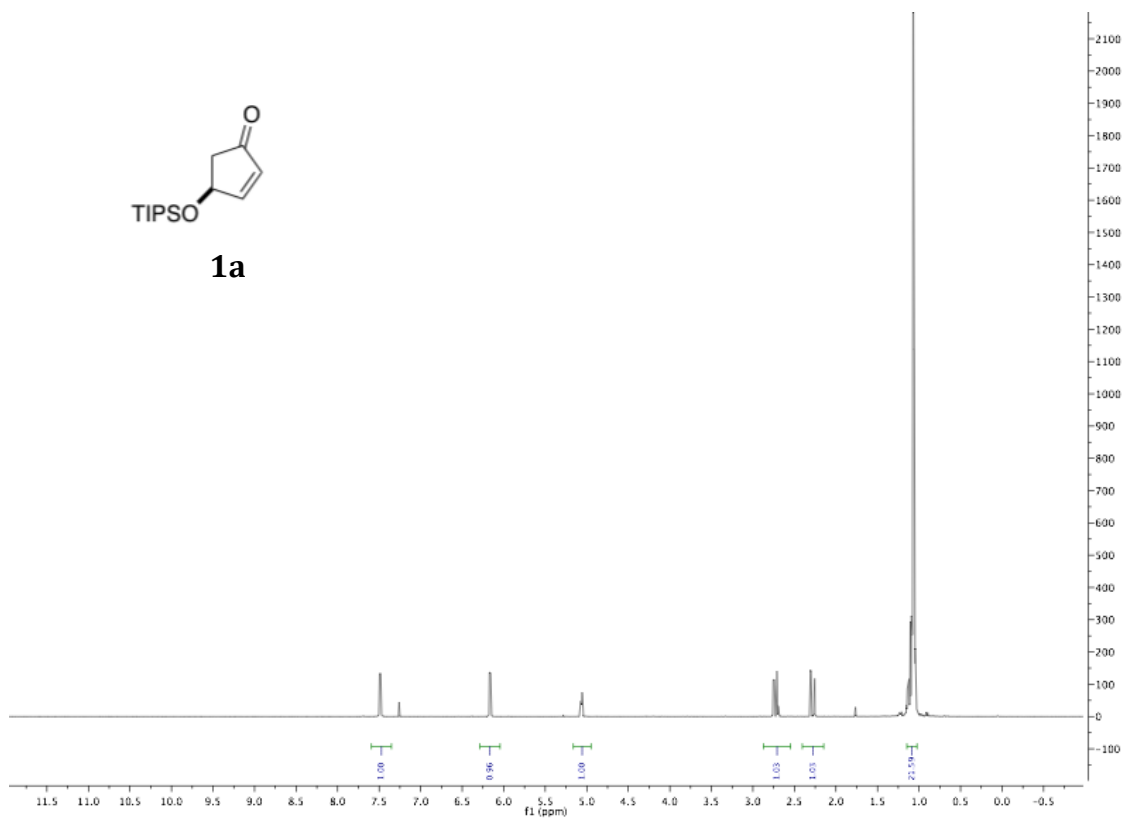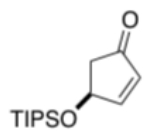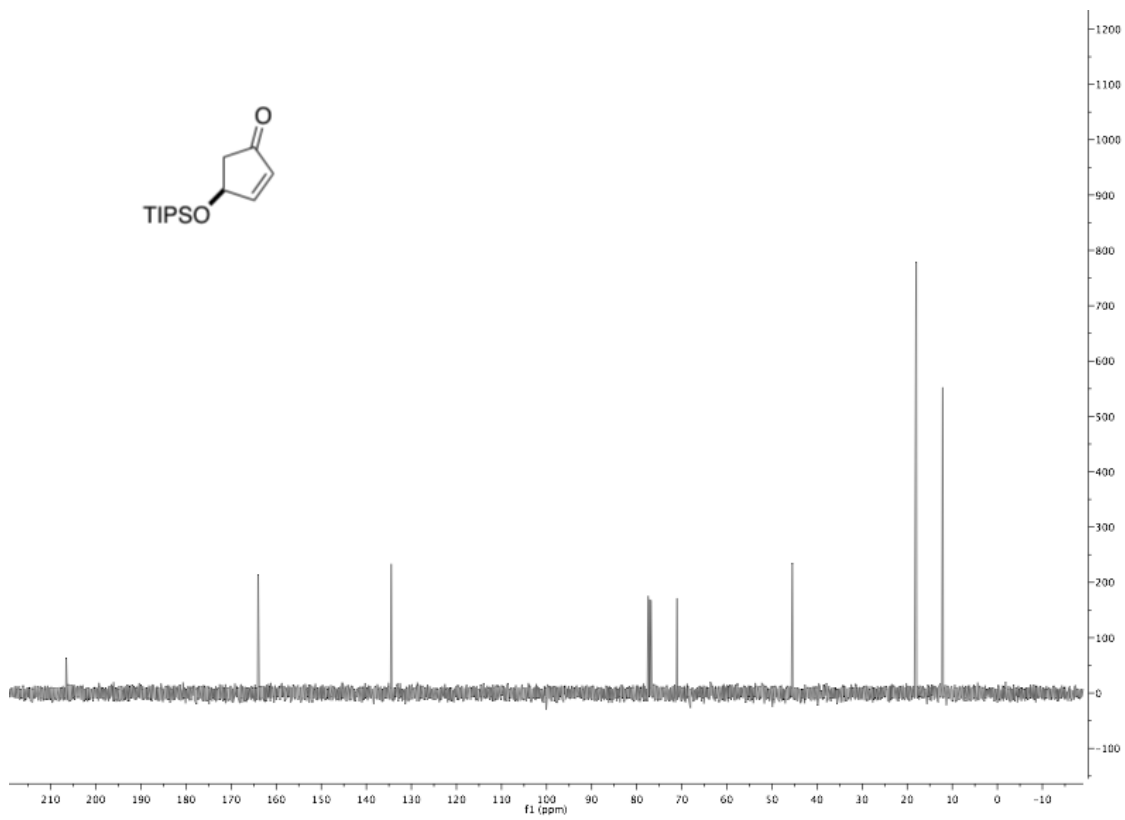

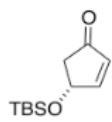

**1b**

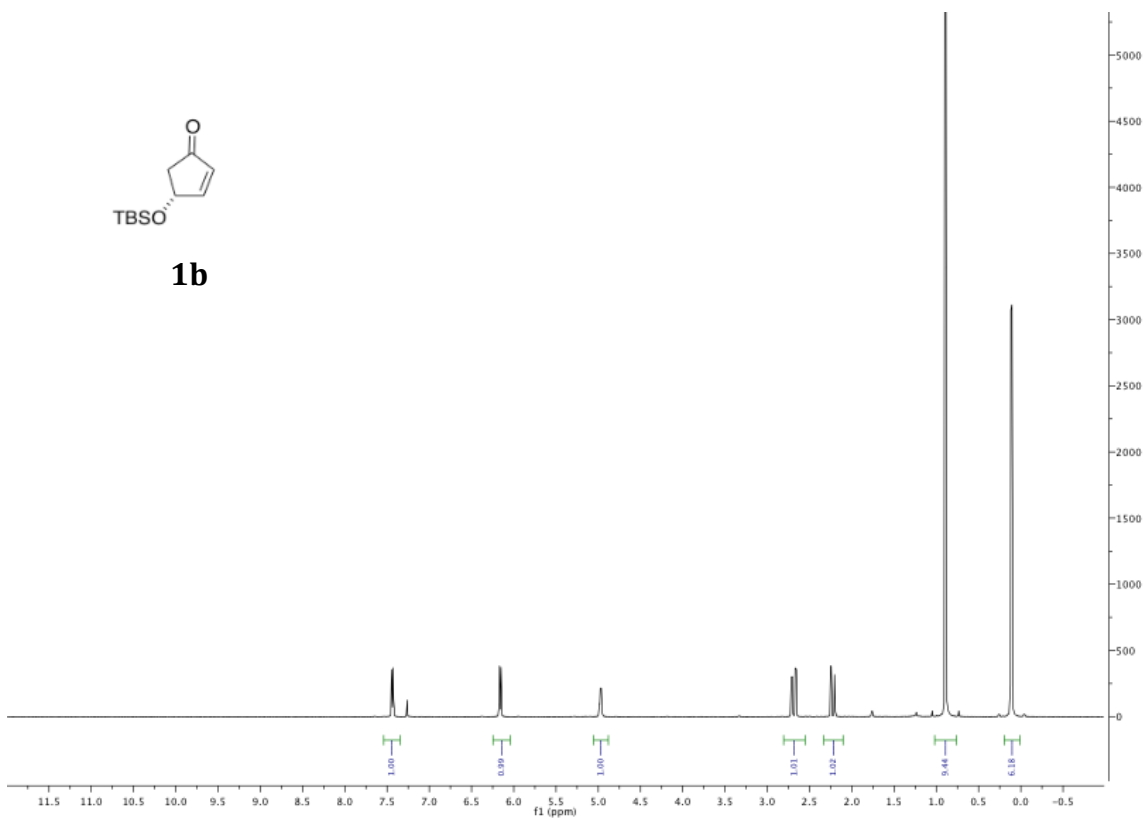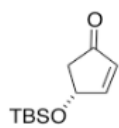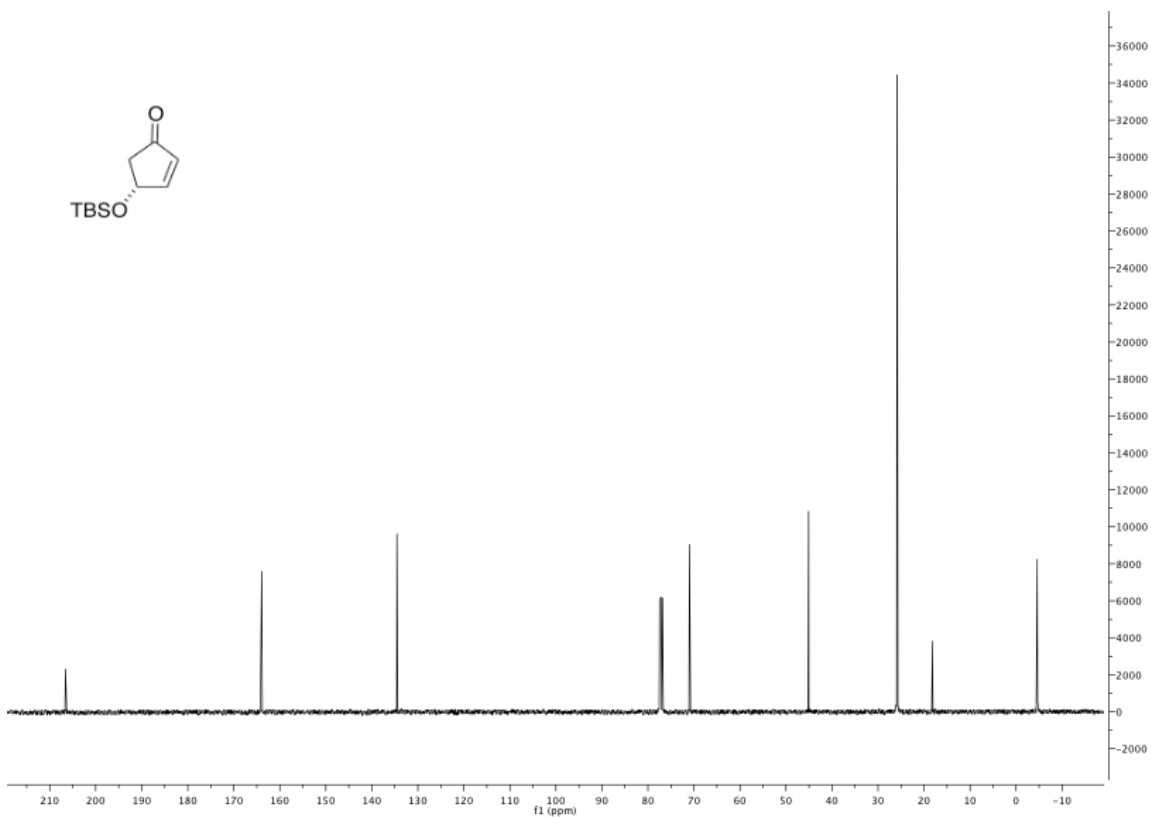

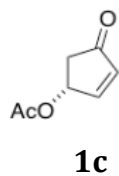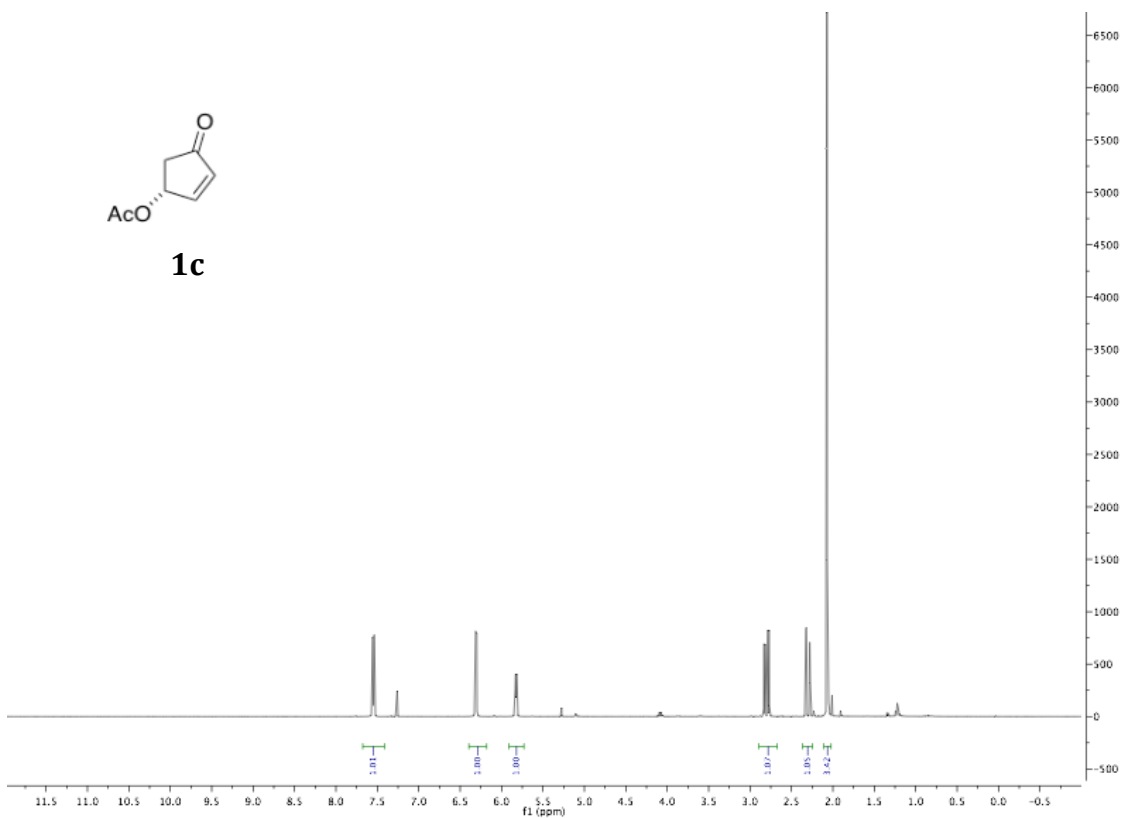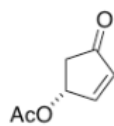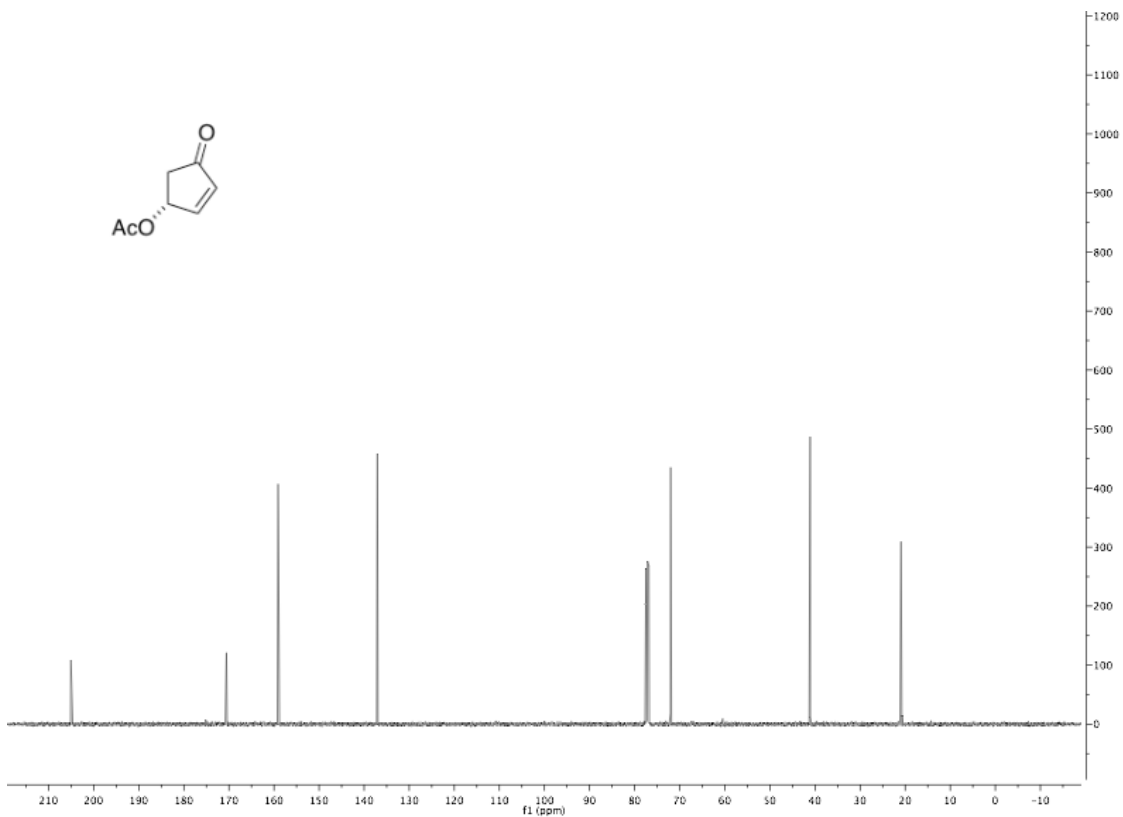

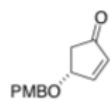

**1d**

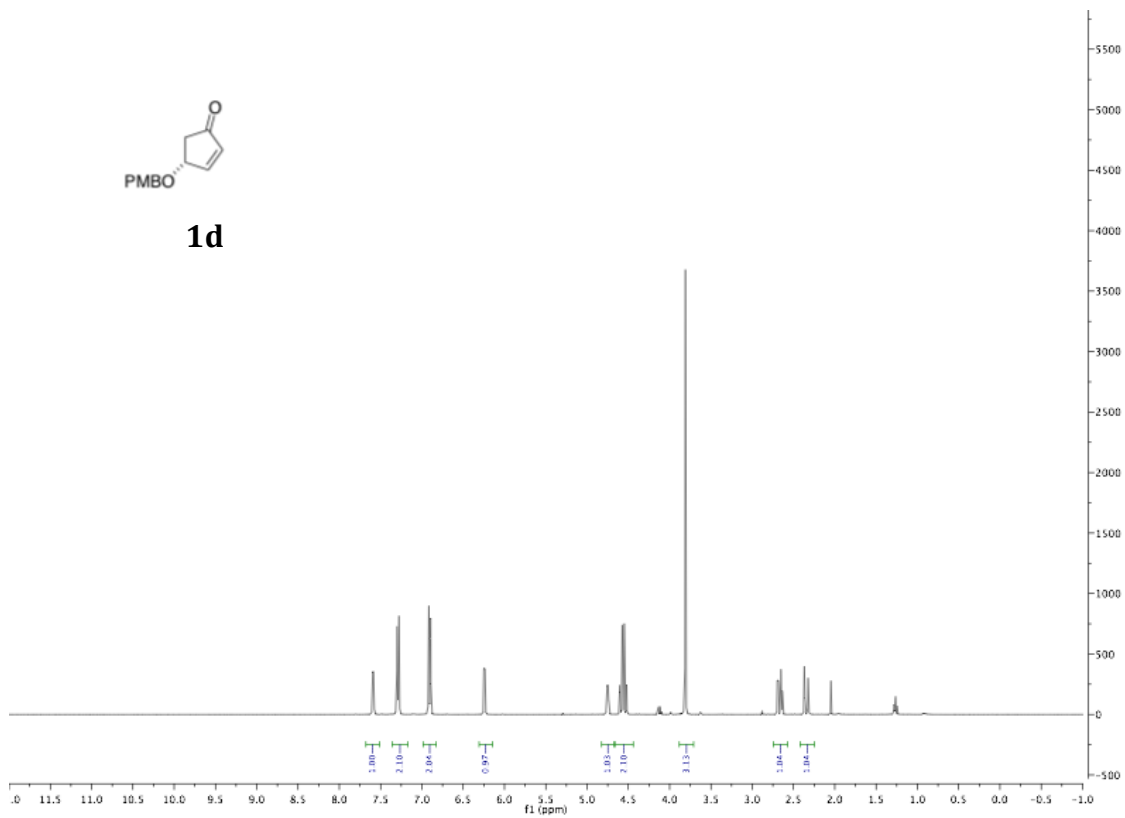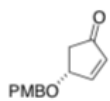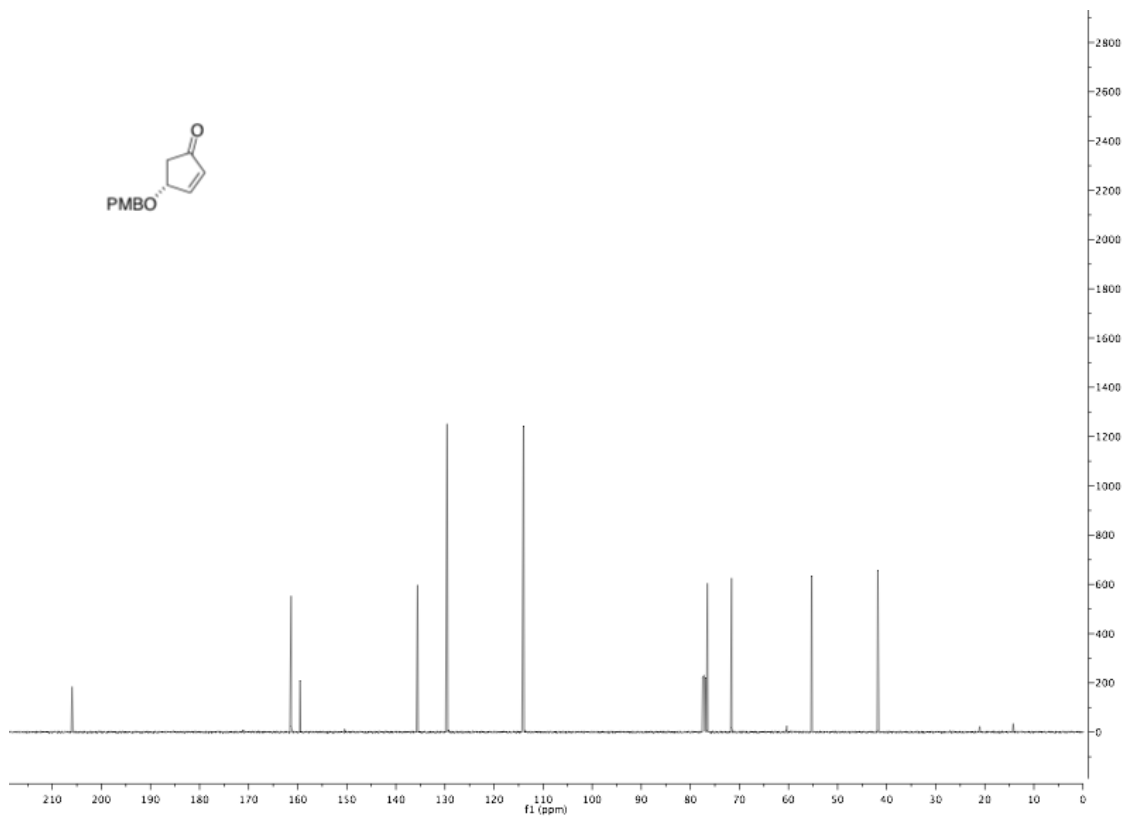

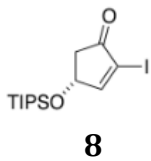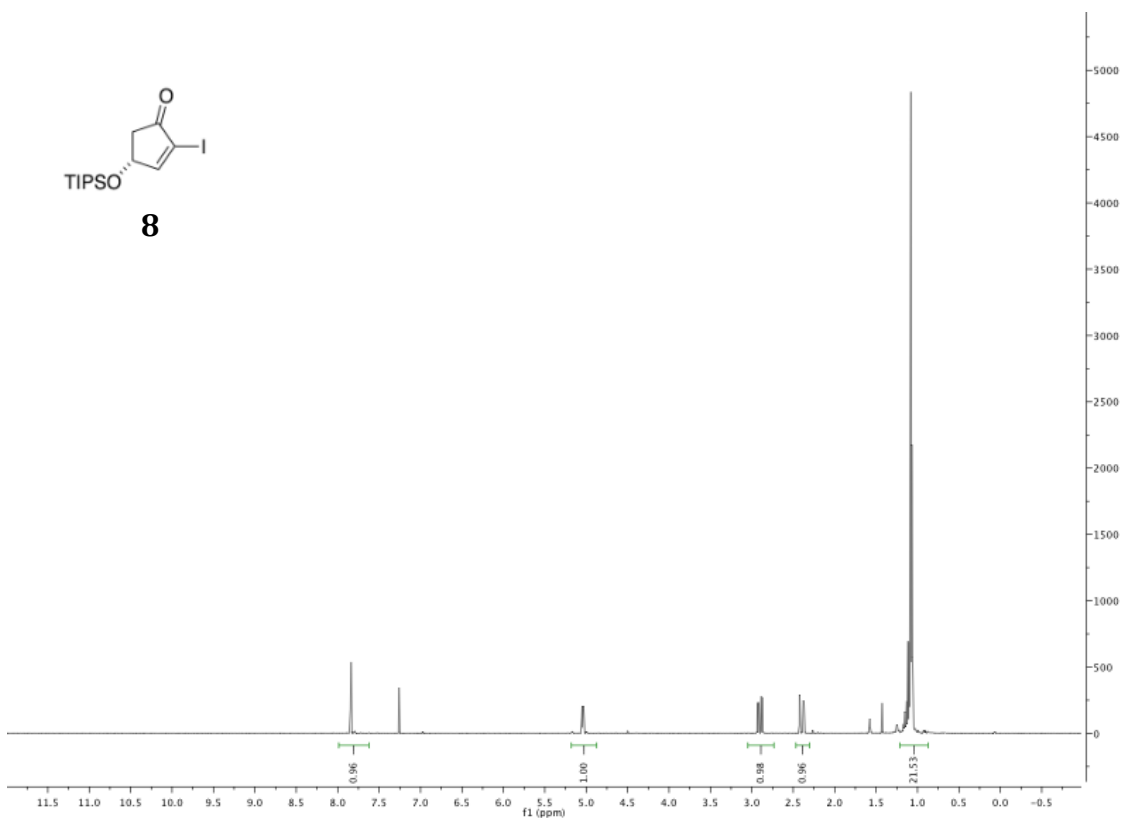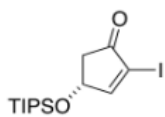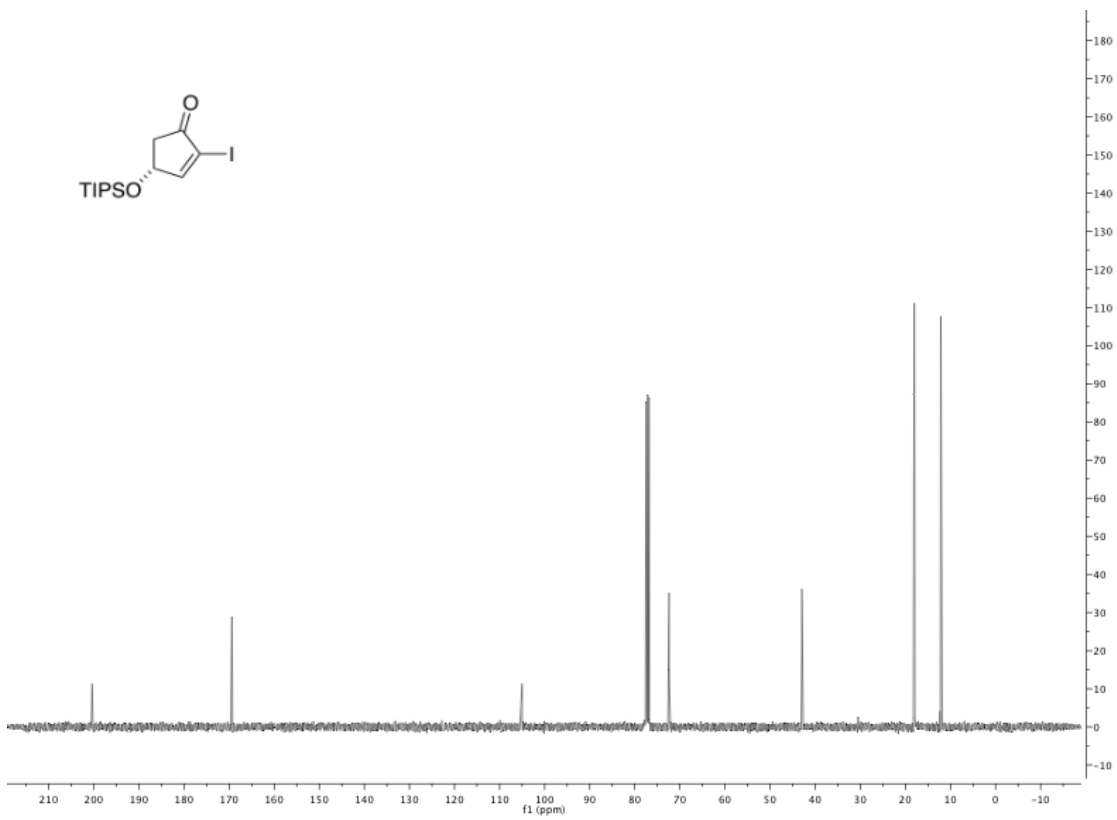

GS-VI-048A

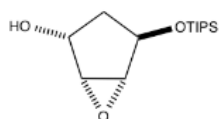

9

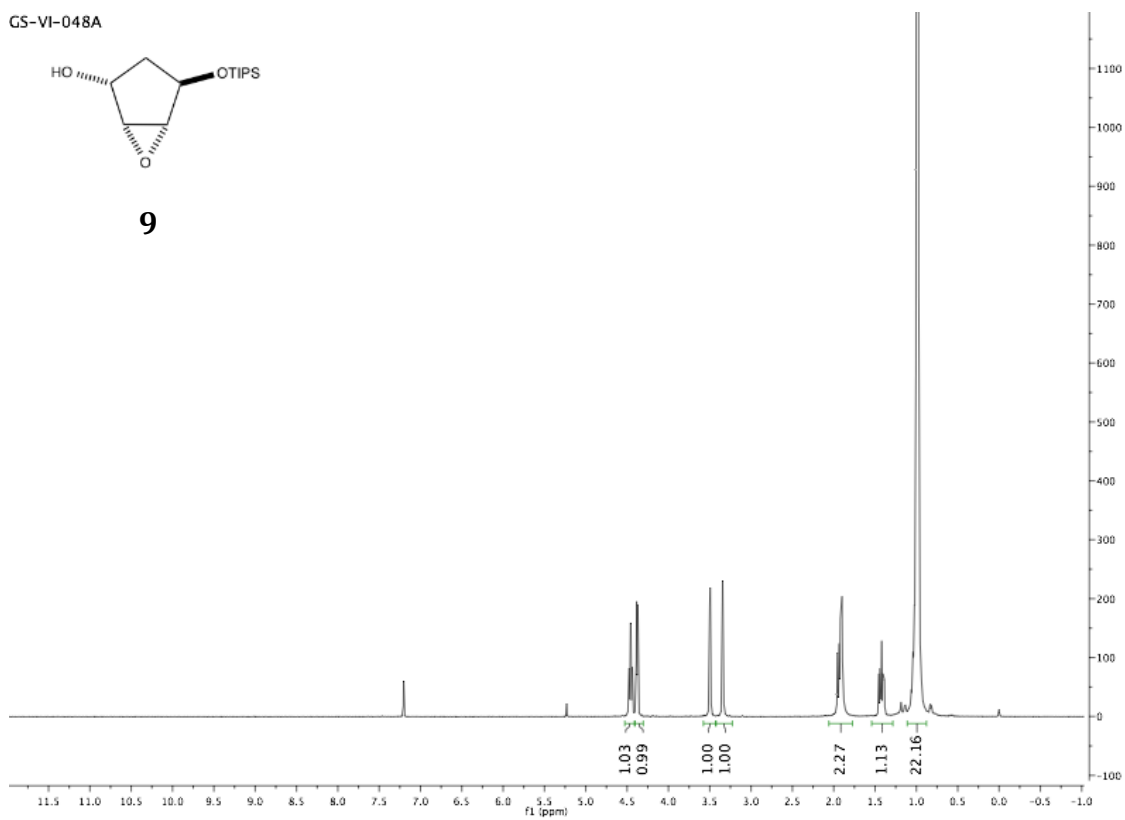

GS-VI-048A

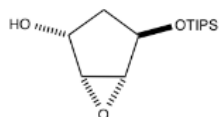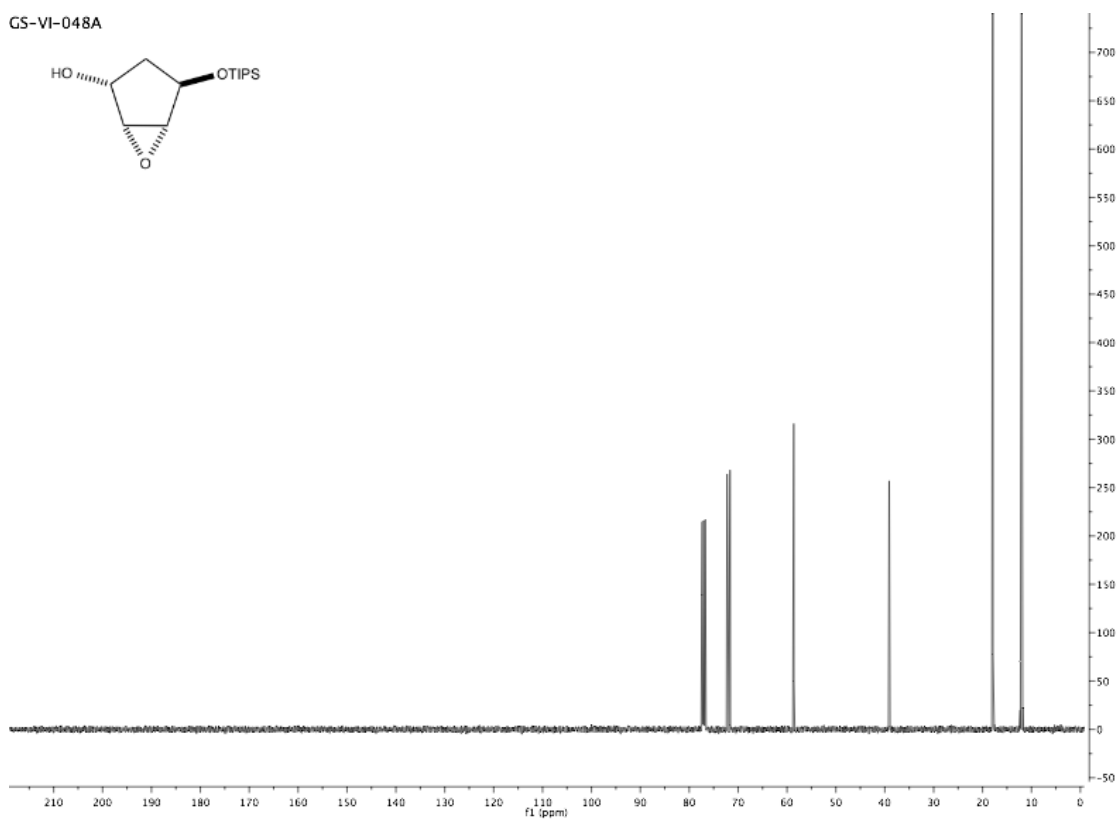



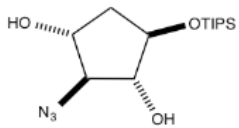

**10**

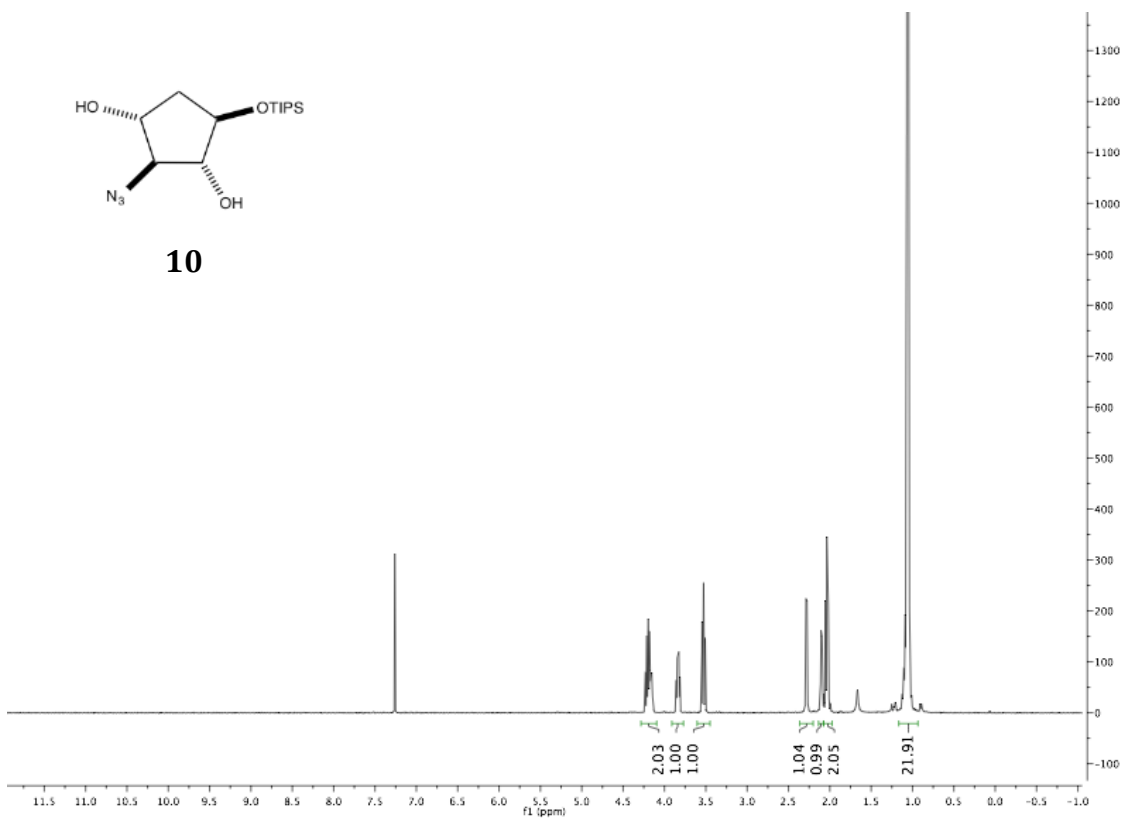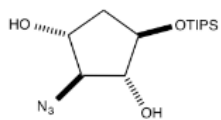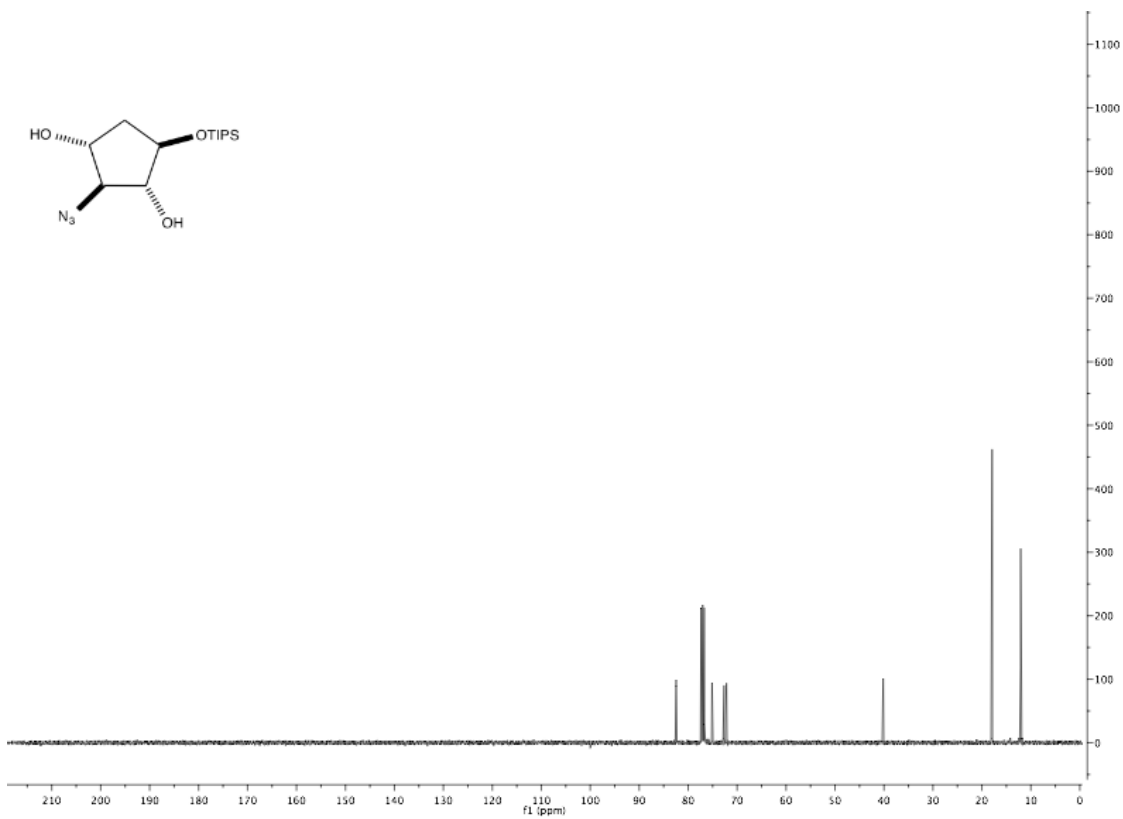

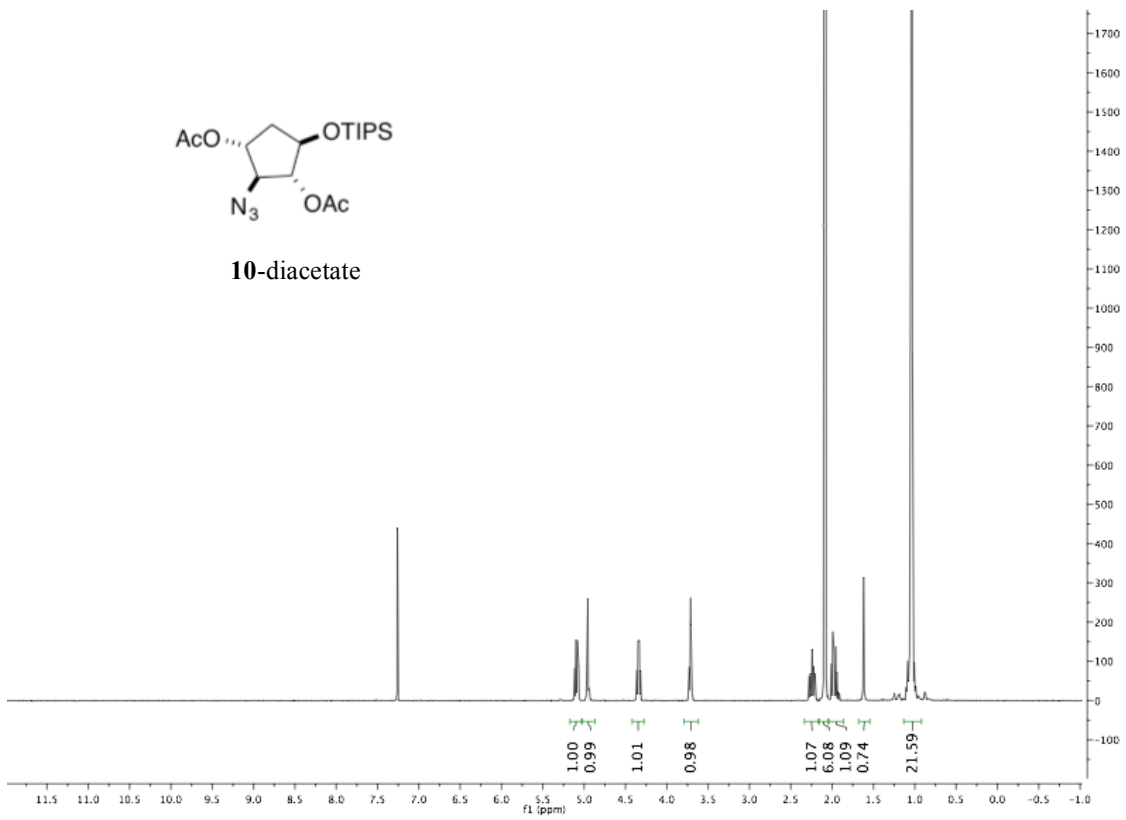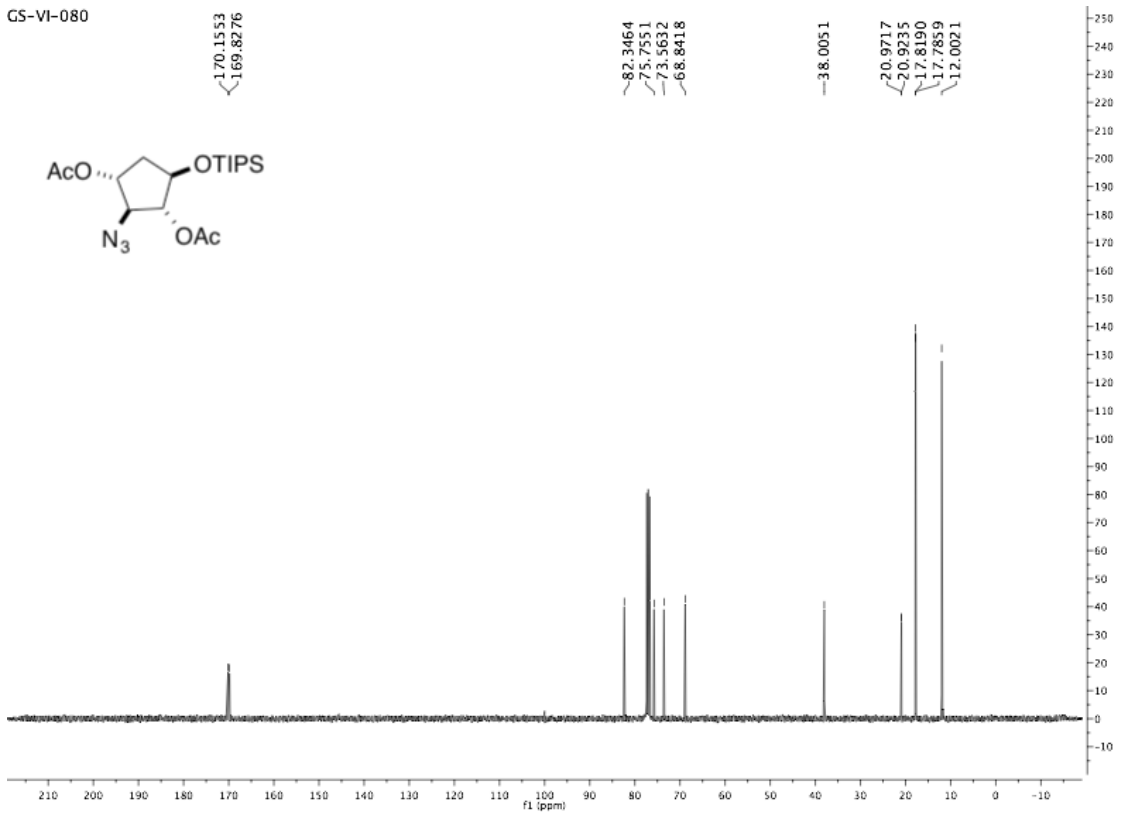

GS-VI-041

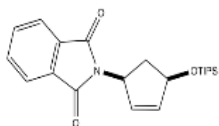

**11**

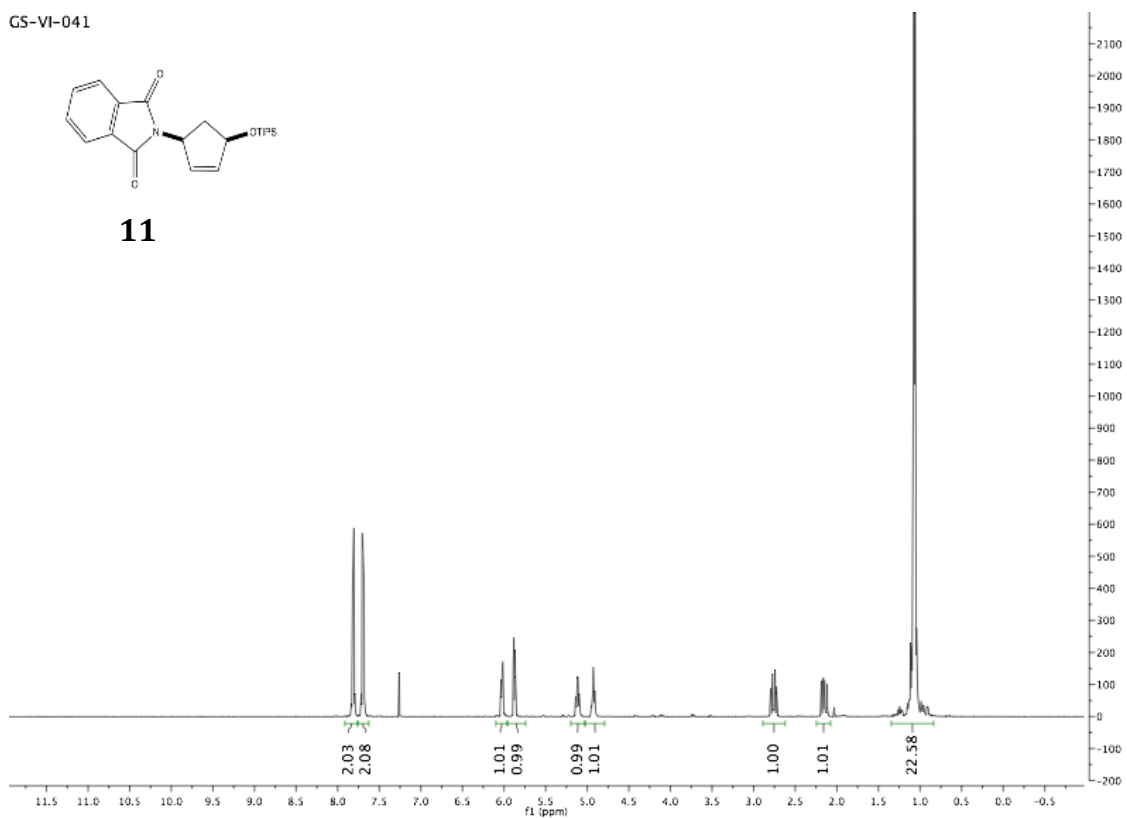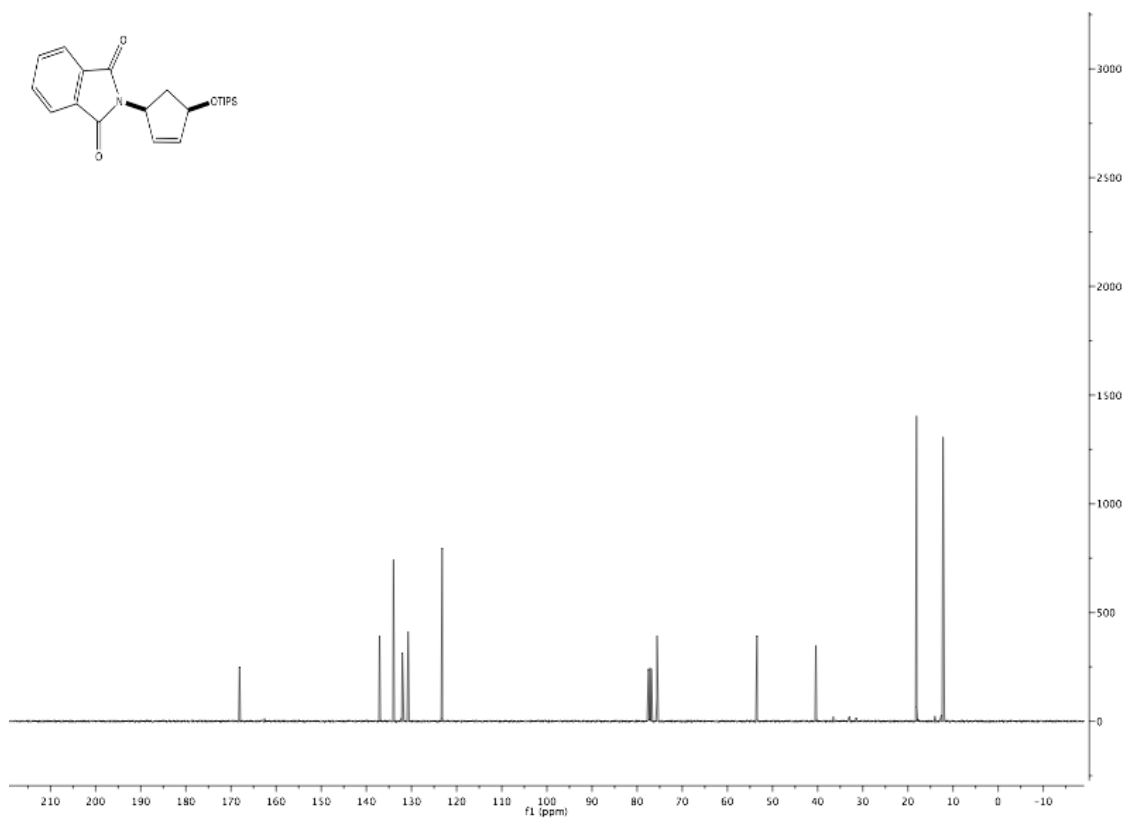

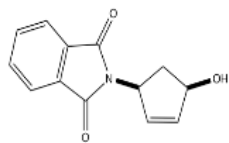

12

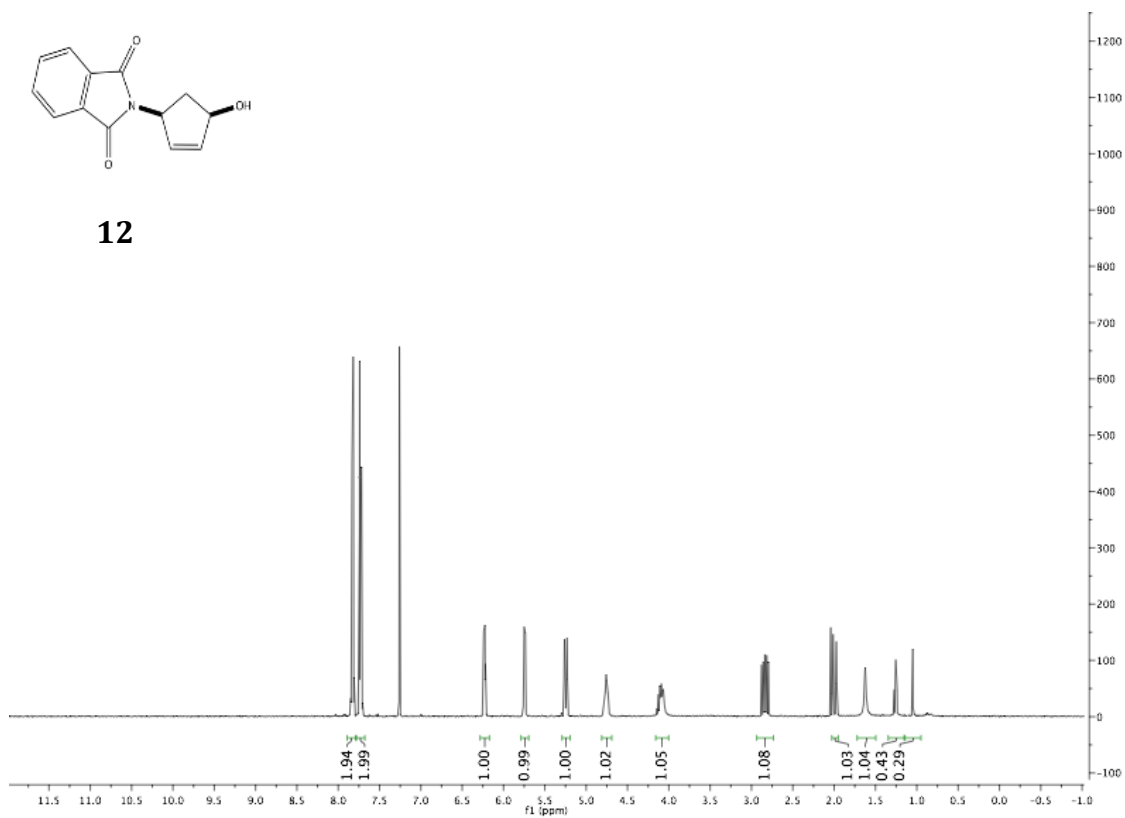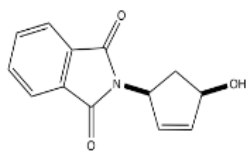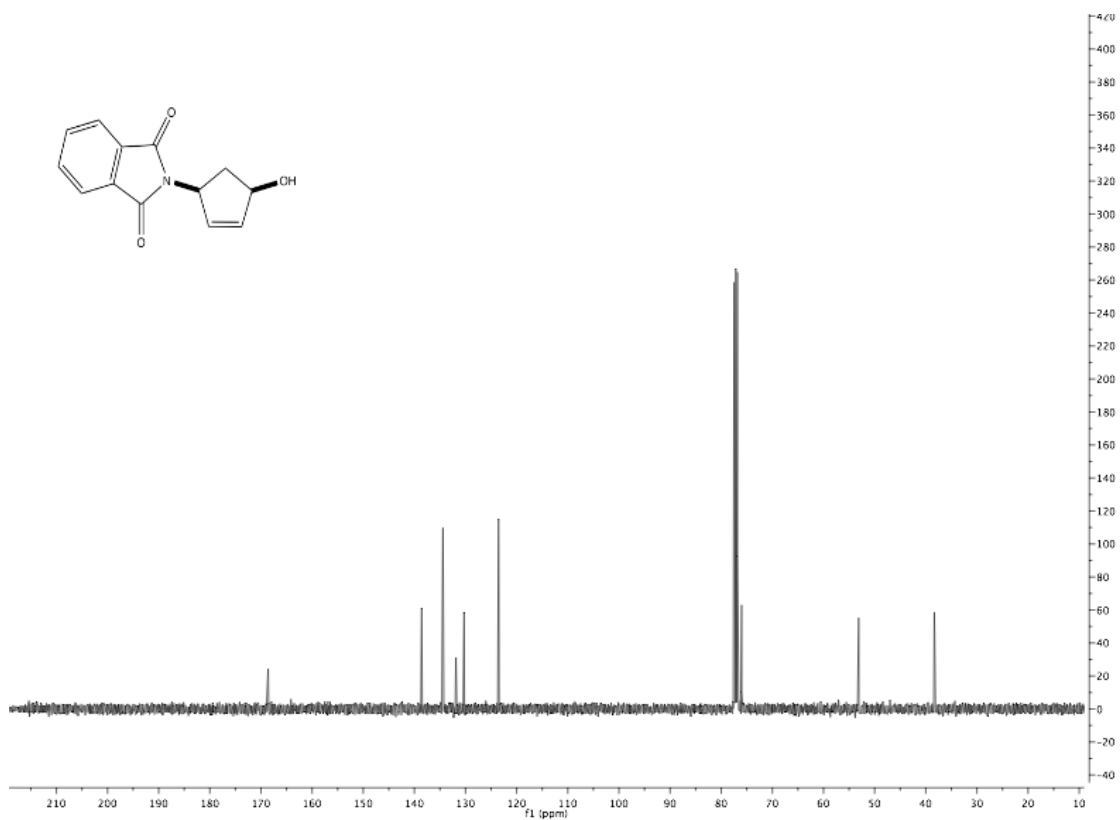

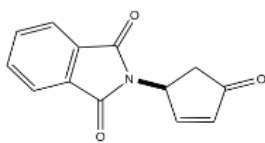

**13**

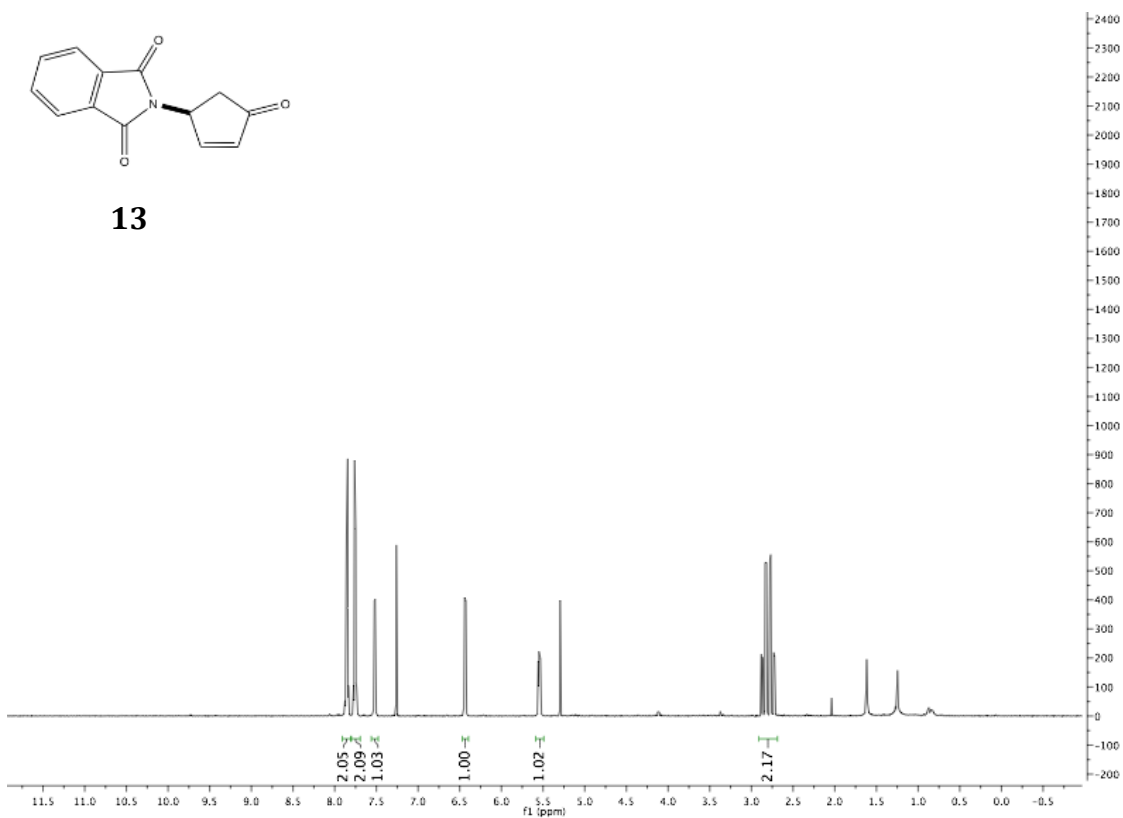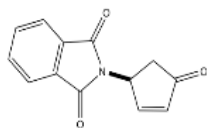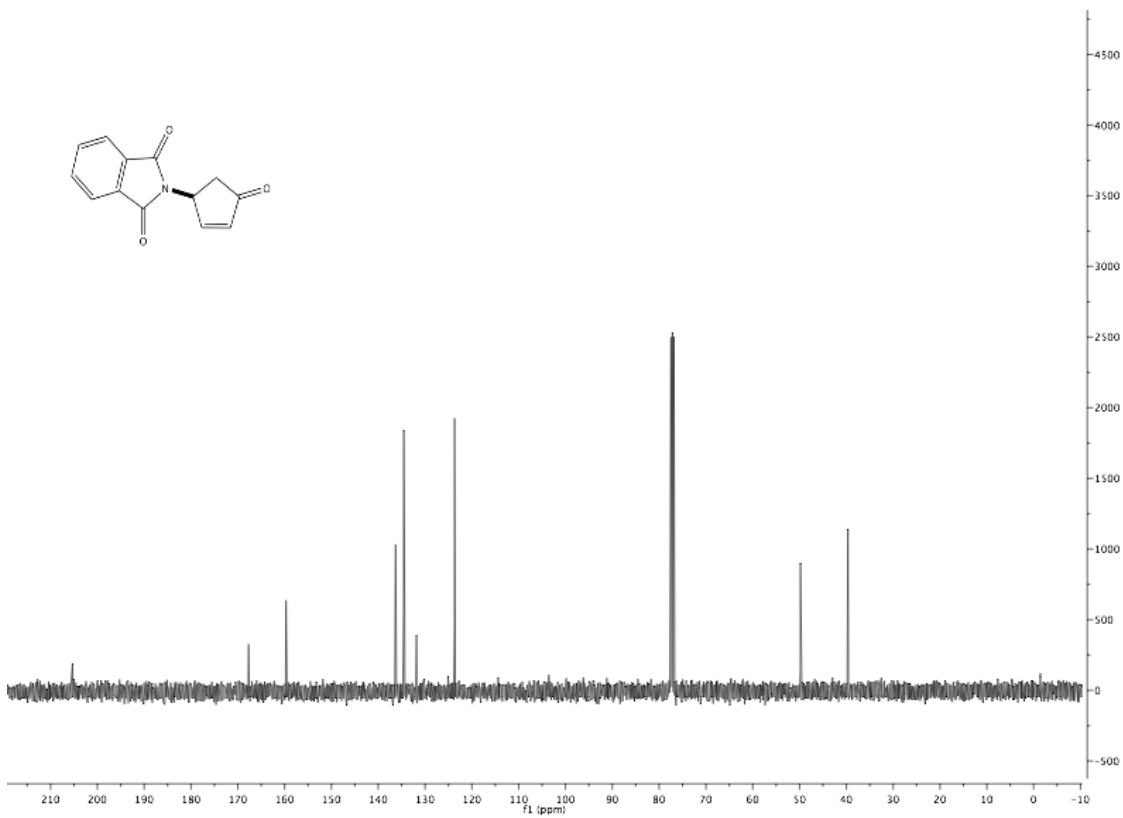

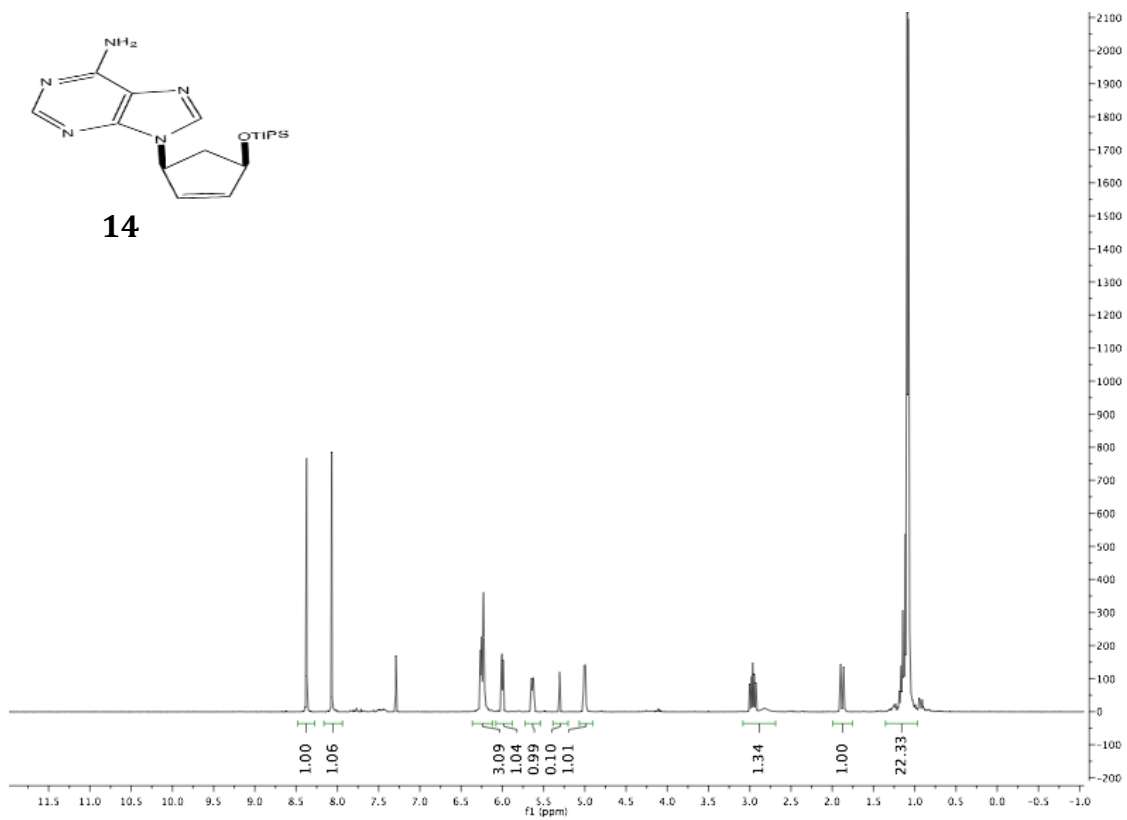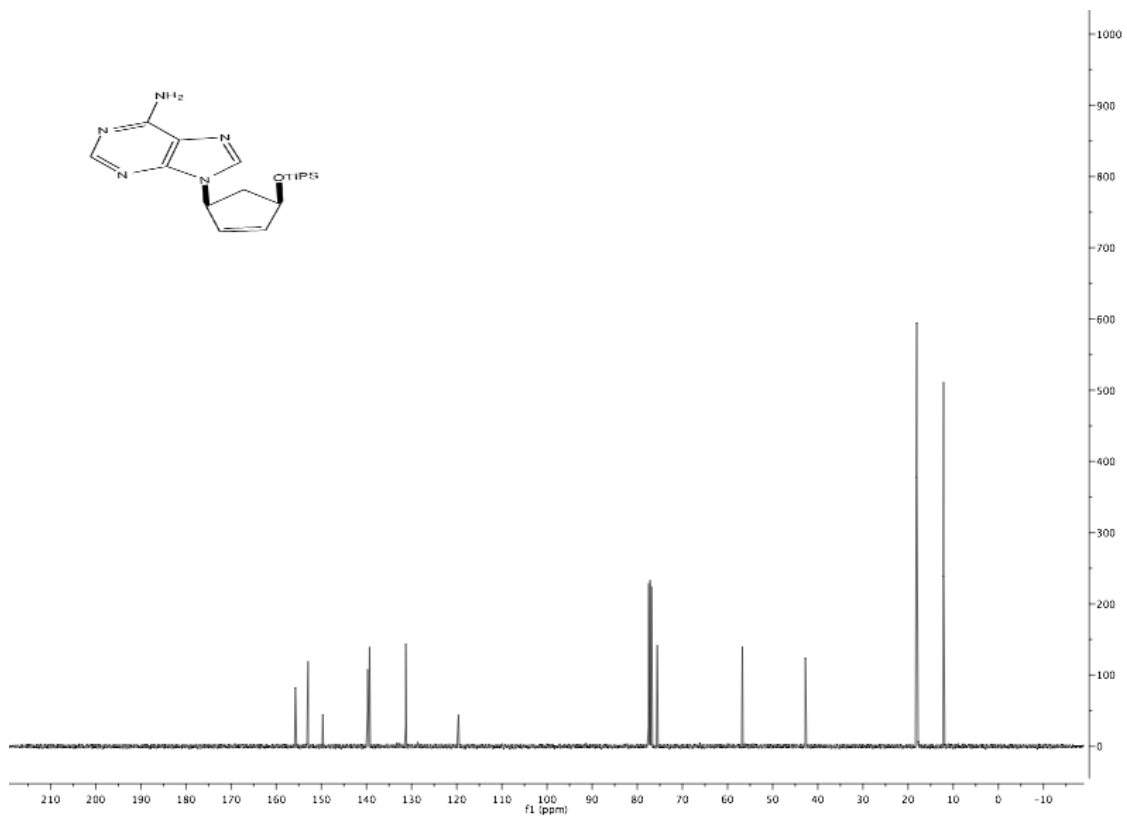

# GC chromatogram of (S)-1a and (R)-1a

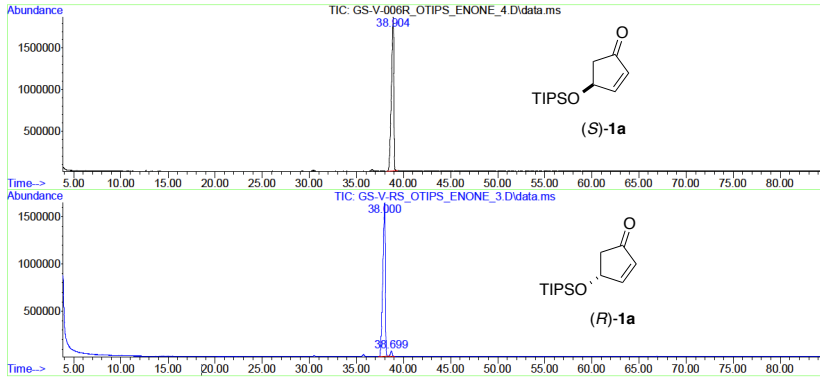

| peak # | R.T. min | first scan | max scan | last scan | PK TY | peak height | corr. area | corr. % max | % of total |
|--------|----------|------------|----------|-----------|-------|-------------|------------|-------------|------------|
| 1      | 38.904   | 5957       | 6071     | 6150      | BB 2  | 1839688     | 327261151  | 100.00%     | 100.000%   |

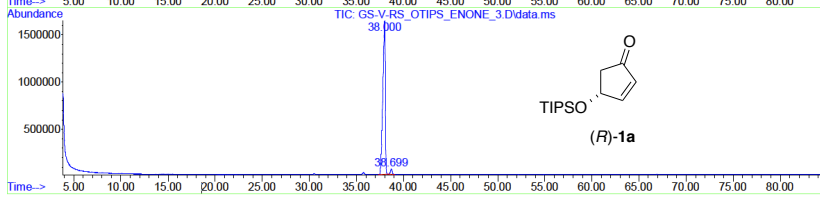

| peak # | R.T. min | first scan | max scan | last scan | PK TY | peak height | corr. area | corr. % max | % of total |
|--------|----------|------------|----------|-----------|-------|-------------|------------|-------------|------------|
| 1      | 38.000   | 5805       | 5914     | 5991      | BB 2  | 1599592     | 297669467  | 100.00%     | 97.561%    |
| 2      | 38.699   | 5995       | 6035     | 6092      | BB 2  | 54935       | 7440532    | 2.50%       | 2.439%     |

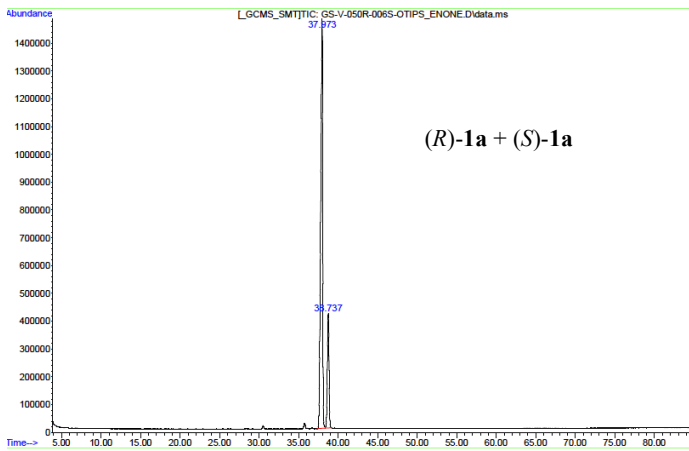

| peak # | R.T. min | first scan | max scan | last scan | PK TY | peak height | corr. area | corr. % max | % of total |
|--------|----------|------------|----------|-----------|-------|-------------|------------|-------------|------------|
| 1      | 37.973   | 5800       | 5910     | 5981      | BV 3  | 1471503     | 261217225  | 100.00%     | 81.327%    |
| 2      | 38.737   | 5981       | 6042     | 6115      | VB 5  | 412102      | 59977695   | 22.96%      | 18.673%    |

## GC chromatogram of **1b**

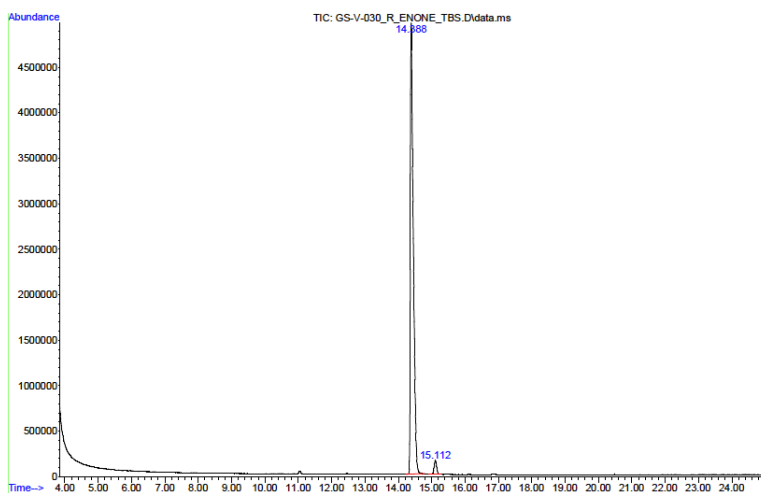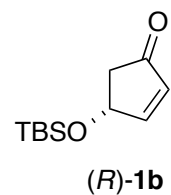

| peak # | R.T. min | first scan | max scan | last scan | PK TY | peak height | corr. area | corr. % | % of total |
|--------|----------|------------|----------|-----------|-------|-------------|------------|---------|------------|
| 1      | 14.388   | 1800       | 1827     | 1892      | BB 2  | 4944348     | 305058683  | 100.00% | 97.546%    |
| 2      | 15.112   | 1919       | 1952     | 1979      | BB 2  | 146863      | 7674271    | 2.52%   | 2.454%     |

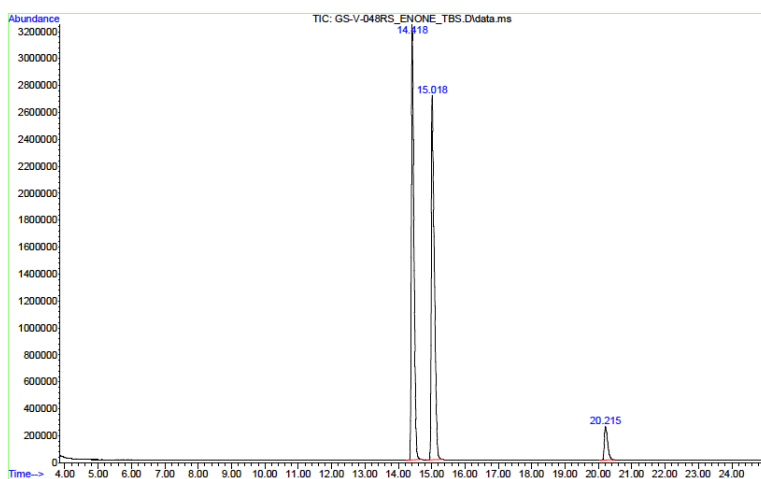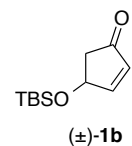

| peak # | R.T. min | first scan | max scan | last scan | PK TY | peak height | corr. area | corr. % | % of total |
|--------|----------|------------|----------|-----------|-------|-------------|------------|---------|------------|
| 1      | 6.316    | 402        | 429      | 469       | BB 2  | 240953      | 14619082   | 8.50%   | 3.965%     |
| 2      | 14.463   | 1813       | 1840     | 1893      | BB    | 3123610     | 172049179  | 100.00% | 46.666%    |
| 3      | 15.062   | 1916       | 1943     | 2003      | BB    | 2746590     | 166065398  | 96.52%  | 45.043%    |
| 4      | 20.263   | 2814       | 2844     | 2891      | BB 2  | 234482      | 15949623   | 9.27%   | 4.326%     |



# GC chromatogram of 1c

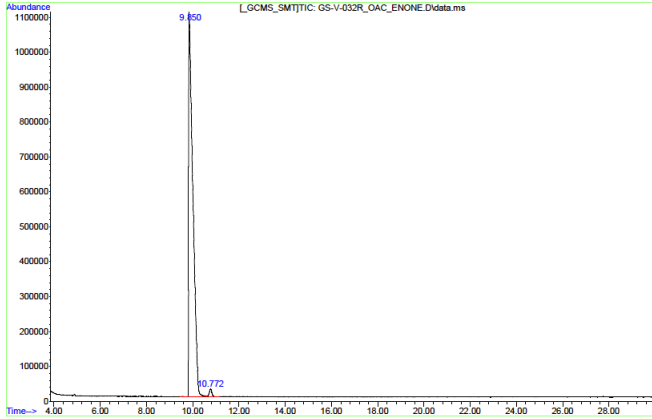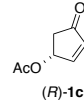

| peak # | R.T. min | first scan | max scan | last scan | PK TY | peak height | corr. area | corr. % | % of max. | % of total |
|--------|----------|------------|----------|-----------|-------|-------------|------------|---------|-----------|------------|
| 1      | 9.850    | 970        | 1041     | 1172      | BV 3  | 1081939     | 136228481  | 100.00% | 100.00%   | 98.697%    |
| 2      | 10.772   | 1172       | 1201     | 1267      | VB 5  | 21548       | 1798473    | 1.32%   | 1.32%     | 1.303%     |

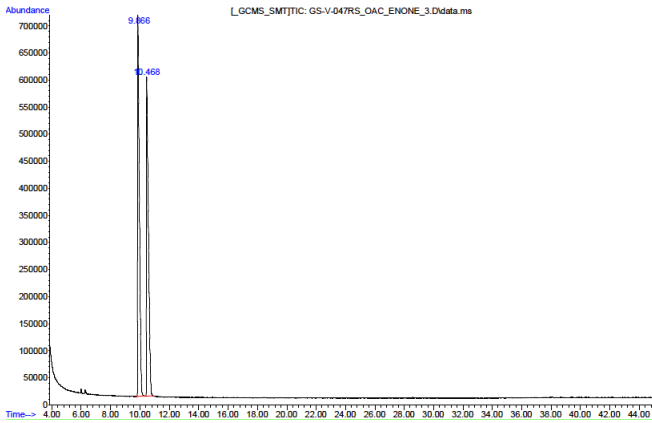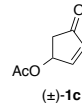

| peak # | R.T. min | first scan | max scan | last scan | PK TY | peak height | corr. area | corr. % | % of max. | % of total |
|--------|----------|------------|----------|-----------|-------|-------------|------------|---------|-----------|------------|
| 1      | 9.866    | 1017       | 1044     | 1115      | BB    | 690231      | 55329375   | 100.00% | 100.00%   | 50.490%    |
| 2      | 10.468   | 1123       | 1148     | 1224      | BB 2  | 583137      | 54255073   | 98.06%  | 98.06%    | 49.510%    |

# GC chromatogram of 8

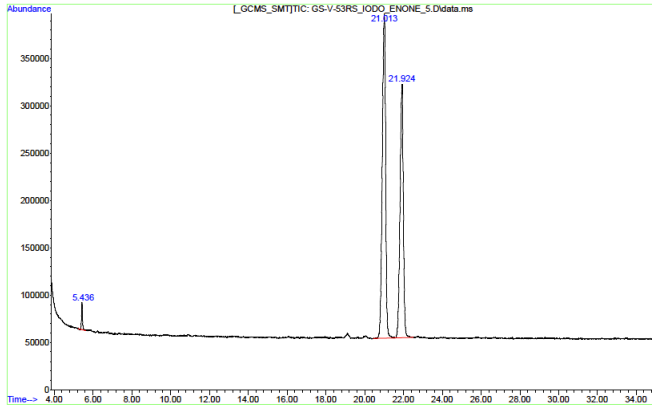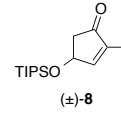

| peak # | R.T. min | first scan | max scan | last scan | PK TY | peak height | corr. area | corr. % max | % of total |
|--------|----------|------------|----------|-----------|-------|-------------|------------|-------------|------------|
| 1      | 5.436    | 243        | 277      | 307       | BB 4  | 28666       | 1022072    | 2.49%       | 1.395%     |
| 2      | 21.013   | 2878       | 2974     | 3070      | BV 7  | 339928      | 41094767   | 100.00%     | 56.071%    |
| 3      | 21.924   | 3070       | 3131     | 3228      | PB 5  | 265233      | 31173342   | 75.86%      | 42.534%    |

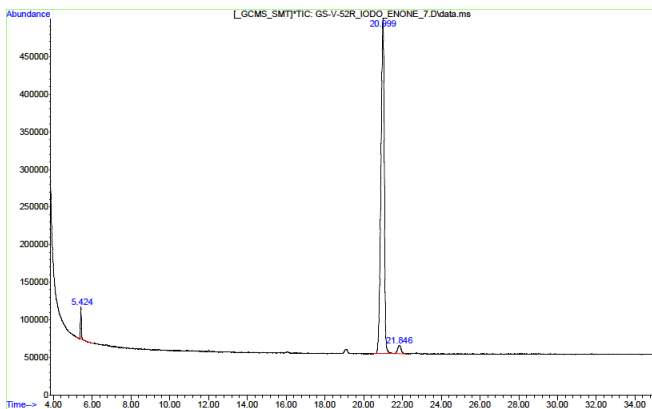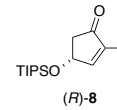

| peak # | R.T. min | first scan | max scan | last scan | PK TY | peak height | corr. area | corr. % max | % of total |
|--------|----------|------------|----------|-----------|-------|-------------|------------|-------------|------------|
| 1      | 5.424    | 232        | 275      | 377       | BB 3  | 42640       | 1302933    | 2.41%       | 2.293%     |
| 2      | 20.999   | 2883       | 2971     | 3072      | BV 4  | 445472      | 54120454   | 100.00%     | 95.252%    |
| 3      | 21.846   | 3072       | 3118     | 3173      | VB 4  | 11022       | 1394992    | 2.58%       | 2.455%     |

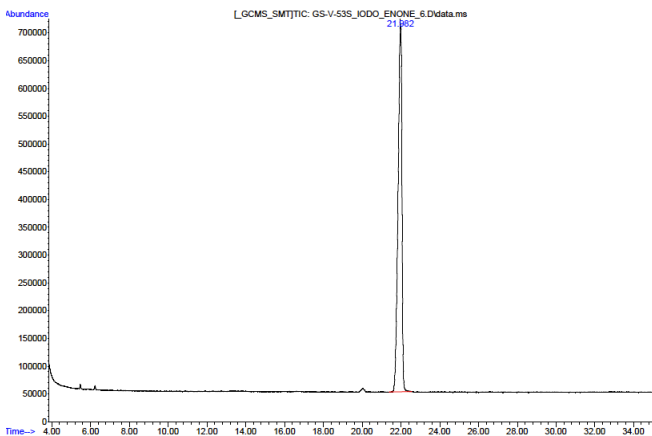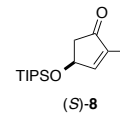

| peak # | R.T. min | first scan | max scan | last scan | PK TY | peak height | corr. area | corr. % max | % of total |
|--------|----------|------------|----------|-----------|-------|-------------|------------|-------------|------------|
| 1      | 21.982   | 3040       | 3141     | 3240      | BB 4  | 653248      | 90964863   | 100.00%     | 100.000%   |

### HPLC Chromatogram of (R)-1d

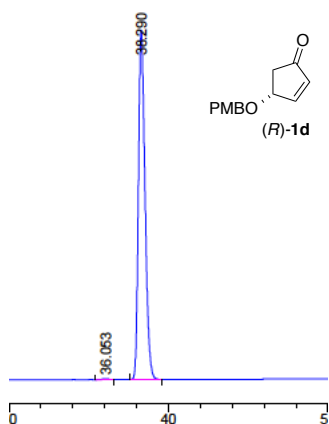

| Peak # | RetTime [min] | Type | Width [min] | Area [mAU*s] | Height [mAU] | Area %  |
|--------|---------------|------|-------------|--------------|--------------|---------|
| 1      | 3.386         | BB   | 0.0752      | 12.46296     | 2.51992      | 0.0407  |
| 2      | 3.642         | BB   | 0.1774      | 59.09811     | 4.39170      | 0.1932  |
| 3      | 6.174         | BB   | 0.1012      | 27.63714     | 4.21924      | 0.0904  |
| 4      | 9.018         | BB   | 0.4737      | 81.68941     | 2.34333      | 0.2671  |
| 5      | 9.792         | BB   | 0.1420      | 361.46484    | 38.33886     | 1.1817  |
| 6      | 36.053        | BB   | 0.3634      | 55.81043     | 2.25170      | 0.1825  |
| 7      | 38.290        | BB   | 0.4421      | 2.84251e4    | 987.47791    | 92.9284 |
| 8      | 54.313        | BB   | 0.3528      | 1564.89624   | 56.40389     | 5.1160  |

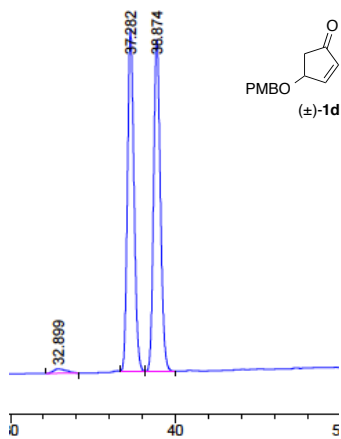

| Peak # | RetTime [min] | Type | Width [min] | Area [mAU*s] | Height [mAU] | Area %  |
|--------|---------------|------|-------------|--------------|--------------|---------|
| 1      | 3.384         | BB   | 0.0785      | 12.86811     | 2.51901      | 0.0822  |
| 2      | 3.654         | BB   | 0.1706      | 58.71095     | 4.56074      | 0.3749  |
| 3      | 9.779         | BB   | 0.1165      | 360.63791    | 46.61044     | 2.3031  |
| 4      | 11.111        | BB   | 0.7730      | 120.21245    | 1.84212      | 0.7677  |
| 5      | 15.064        | BB   | 0.3652      | 608.60156    | 27.42497     | 3.8866  |
| 6      | 32.899        | BB   | 0.7198      | 145.78445    | 2.74620      | 0.9310  |
| 7      | 37.282        | BB   | 0.4251      | 6076.44141   | 221.33643    | 38.8052 |
| 8      | 38.874        | BB   | 0.4415      | 6139.93311   | 214.63957    | 39.2107 |
| 9      | 54.310        | BB   | 0.3267      | 2135.62842   | 83.32566     | 13.6385 |
